# Supplementary material for: A unified ML framework for solubility prediction across organic solvents
Source: Royal Society of Chemistry journal article supplement (doi:10.1039/d2dd00024e), 2023-01-01
Supplement: d2dd00024e1.pdf [file d2dd00024e1.pdf]

## SI 1: Scree plot for PCA of DrugBank dataset

Below is presented the accompanying scree plot for the PCA detailed in the main text. The large number of PCs required to capture the variance is a reflection of the rich information content of the feature set; indeed, it would reflect poorly on it if it could be easily reduced to a small number of dimensions.

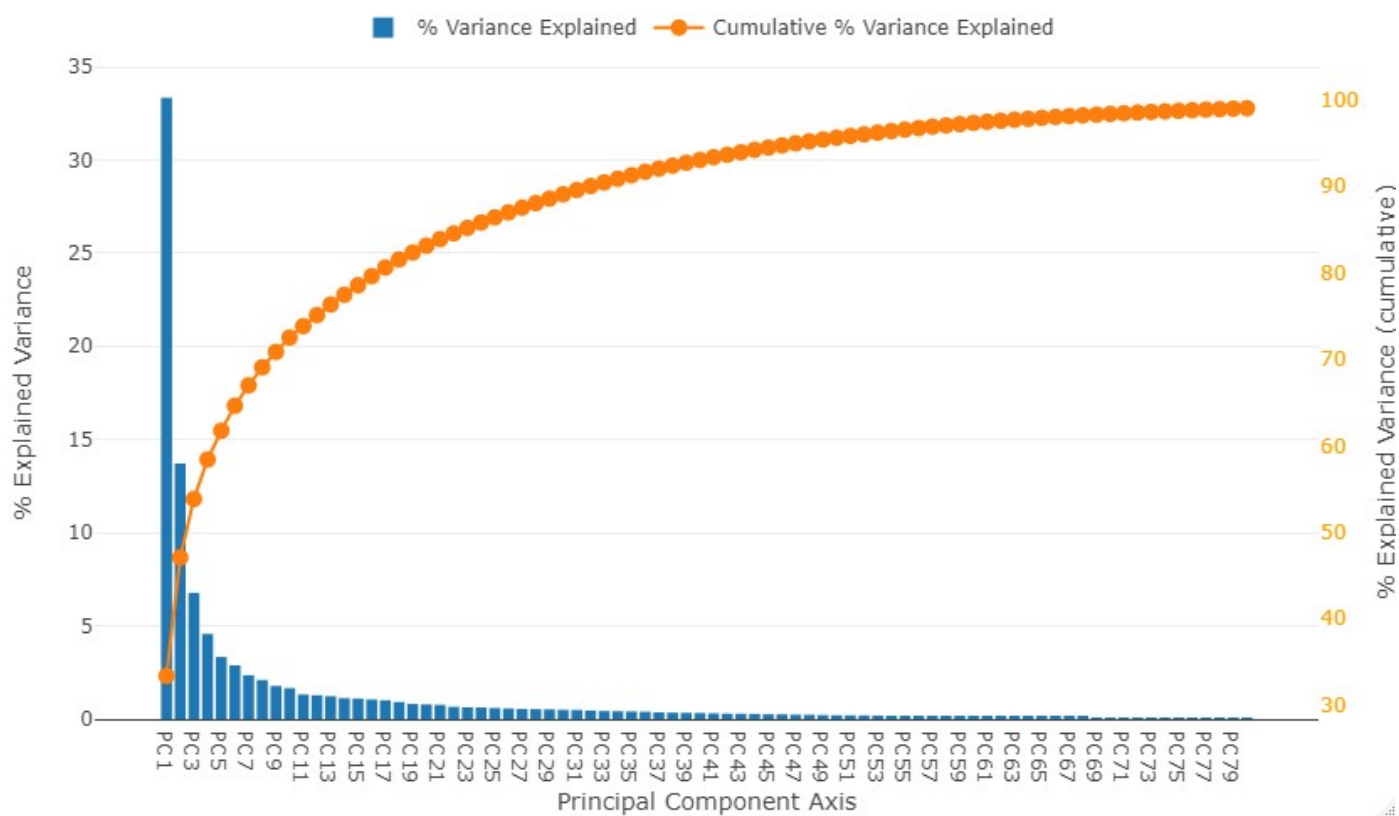

Figure SI-1. Accompanying scree plot for the PCA detailed in the main text.

## SI 2: High error results

Readers may be interested in examining individual systems poorly predicted by COSMO-RS and our RF-based models. Below are listed i) the 50 highest-error COSMO-RS predictions for our dataset and ii) the 50 highest-error RF-hybrid (10-fold CV) predictions for our dataset. All solubility values are in  $\log_{10}(\text{g}/100\text{g})$ .

These data are included in the repository at [https://github.com/AntonyVass/cmac\\_solpred\\_cosmo\\_rf](https://github.com/AntonyVass/cmac_solpred_cosmo_rf).

| Solvent Name       | Solute Name                                                                                                                | Exp. Solubility | COSMO Solubility | COSMO abs. error | RF Solubility | RF Abs. Error |
|--------------------|----------------------------------------------------------------------------------------------------------------------------|-----------------|------------------|------------------|---------------|---------------|
| Tetrahydrofuran    | hydrocortisone                                                                                                             | -1.9615         | 1.9971           | <b>3.9586</b>    | -0.1635       | 1.7980        |
| 2-Propanol         | Sulfapyridine                                                                                                              | -0.6518         | 2.5258           | <b>3.1777</b>    | -0.0349       | 0.6169        |
| Acetonitrile       | glibenclamide                                                                                                              | -2.9626         | 0.2058           | <b>3.1683</b>    | -1.5324       | 1.4302        |
| Methanol           | 2-aminoacetic acid                                                                                                         | -3.3979         | -0.2381          | <b>3.1599</b>    | -0.7616       | 2.6363        |
| Ethyl Acetate      | ascorbic acid                                                                                                              | -1.5850         | 1.5090           | <b>3.0940</b>    | -0.4038       | 1.1812        |
| Tetrahydrofuran    | paracetamol                                                                                                                | -1.4318         | 1.4971           | <b>2.9289</b>    | 1.1767        | 2.6085        |
| Ethanol            | 2-aminoacetic acid                                                                                                         | -3.5229         | -0.6261          | <b>2.8967</b>    | -1.1155       | 2.4073        |
| Formamide          | ibuprofen                                                                                                                  | -0.1825         | 2.6561           | <b>2.8386</b>    | 1.6192        | 1.8017        |
| Acetonitrile       | ascorbic acid                                                                                                              | -0.9872         | 1.8183           | <b>2.8055</b>    | -0.2224       | 0.7647        |
| Acetonitrile       | 3-pyridinecarboxylic acid                                                                                                  | -1.2558         | 1.5327           | <b>2.7885</b>    | 0.5552        | 1.8110        |
| 1-Octanol          | Sulfapyridine                                                                                                              | -1.8214         | 0.9644           | <b>2.7859</b>    | -0.2375       | 1.5839        |
| Methanol           | glibenclamide                                                                                                              | -2.7258         | -0.0181          | <b>2.7077</b>    | -1.7453       | 0.9806        |
| Acetone            | glibenclamide                                                                                                              | -1.9780         | 0.7219           | <b>2.6998</b>    | -0.8647       | 1.1133        |
| Propionic Acid     | 2,2-dichloro-n-((1s,2r)-1-(fluoromethyl)-2-hydroxy-2-(4-(methylsulfonyl)phenyl)ethyl)acetamide                             | -0.5655         | 2.0158           | <b>2.5813</b>    | 0.5046        | 1.0701        |
| Chloroform         | hydrocortisone                                                                                                             | -0.5653         | 1.9364           | <b>2.5017</b>    | -0.3387       | 0.2266        |
| Acetone            | 311-03-5                                                                                                                   | -0.5925         | 1.6738           | <b>2.2663</b>    | 0.0880        | 0.6805        |
| Methanol           | haloperidol                                                                                                                | 0.2547          | 2.5144           | <b>2.2597</b>    | 0.8929        | 0.6382        |
| 1,2-Dichloroethane | 311-03-5                                                                                                                   | -0.5659         | 1.6921           | <b>2.2580</b>    | -0.0758       | 0.4901        |
| 2-Propanol         | ascorbic acid                                                                                                              | -0.7338         | 1.4295           | <b>2.1633</b>    | -0.3955       | 0.3383        |
| Ethyl Acetate      | hydrocortisone                                                                                                             | -0.5061         | 1.6545           | <b>2.1606</b>    | -0.4556       | 0.0504        |
| Benzene            | hydrocortisone                                                                                                             | -1.8296         | 0.3029           | <b>2.1325</b>    | -1.1609       | 0.6687        |
| Ethanol            | glibenclamide                                                                                                              | -2.6345         | -0.5781          | <b>2.0564</b>    | -2.0751       | 0.5594        |
| Acetone            | (2R,3R,4R,5S)-hexane-1,2,3,4,5,6-hexol                                                                                     | -0.9213         | 1.1125           | <b>2.0338</b>    | -0.3484       | 0.5730        |
| Acetone            | 3-((6-O-(6-deoxy-??-L-mannopyranosyl)-??-D-glucopyranosyl)oxy)-2-(3,4-dihydroxyphenol)-5,7-dihydroxy-4H-1-benzopyran-4-one | -0.5452         | 1.4576           | <b>2.0029</b>    | 0.3576        | 0.9028        |
| Ethyl Acetate      | lamivudine                                                                                                                 | -2.2007         | -0.2210          | <b>1.9797</b>    | -0.5668       | 1.6338        |
| Isopropyl Acetate  | hydrocortisone                                                                                                             | -0.7947         | 1.1719           | <b>1.9666</b>    | -0.6089       | 0.1858        |
| Tetrahydrofuran    | sulfamethoxypyridazine                                                                                                     | -1.8083         | 0.1313           | <b>1.9395</b>    | -0.2467       | 1.5616        |
| Dichloromethane    | 311-03-5                                                                                                                   | -0.0228         | 1.8862           | <b>1.9090</b>    | -0.2027       | 0.1799        |
| Methyl Acetate     | hydrocortisone                                                                                                             | -0.2017         | 1.7041           | <b>1.9058</b>    | -0.3011       | 0.0994        |
| Benzene            | ibuprofen                                                                                                                  | 1.3882          | 3.2879           | <b>1.8997</b>    | 1.1579        | 0.2302        |
| Tetrahydrofuran    | 311-03-5                                                                                                                   | -0.1482         | 1.7505           | <b>1.8987</b>    | -0.0762       | 0.0720        |
| Benzene            | piroxicam                                                                                                                  | -1.5139         | 0.3769           | <b>1.8908</b>    | -0.9281       | 0.5858        |
| Chloroform         | 311-03-5                                                                                                                   | -0.0835         | 1.7866           | <b>1.8700</b>    | 0.1051        | 0.1886        |
| acetophenone       | ibuprofen                                                                                                                  | -0.2772         | 1.5601           | <b>1.8372</b>    | 1.4695        | 1.7467        |
| Ethanol            | ascorbic acid                                                                                                              | 0.0202          | 1.8523           | <b>1.8322</b>    | 0.0480        | 0.0278        |
| Dichloromethane    | n-(1-oxopentyl)-n-((2-(1h-tetrazol-5-yl)(1,1-biphenyl)-4-yl)methyl)-l-valine                                               | 0.2925          | 2.1225           | <b>1.8300</b>    | 0.1268        | 0.1657        |
| 2-Propanol         | glibenclamide                                                                                                              | -2.7055         | -0.9017          | <b>1.8038</b>    | -2.0492       | 0.6564        |
| Ethyl Acetate      | glibenclamide                                                                                                              | -1.4915         | 0.3093           | <b>1.8008</b>    | -1.6030       | 0.1115        |
| Chloroform         | n-(1-oxopentyl)-n-((2-(1h-tetrazol-5-yl)(1,1-biphenyl)-4-yl)methyl)-l-valine                                               | 0.1913          | 1.9882           | <b>1.7969</b>    | 0.4732        | 0.2819        |
| Acetone            | haloperidol                                                                                                                | 0.3023          | 2.0944           | <b>1.7921</b>    | 0.9224        | 0.6201        |

| Solvent Name              | Solute Name                                                                                                                | Exp. Solubility | COSMO Solubility | COSMO abs. Error | RF Solubility | RF Abs. Error |
|---------------------------|----------------------------------------------------------------------------------------------------------------------------|-----------------|------------------|------------------|---------------|---------------|
| Water                     | 2-aminoacetic acid                                                                                                         | 1.3813          | 0.1143           | -1.2670          | -1.5556       | <b>2.9369</b> |
| Methanol                  | 2-aminoacetic acid                                                                                                         | -3.3979         | -0.2381          | 3.1599           | -0.7616       | <b>2.6363</b> |
| Tetrahydrofuran           | paracetamol                                                                                                                | -1.4318         | 1.4971           | 2.9289           | 1.1767        | <b>2.6085</b> |
| Water                     | (2S)-5,7-dihydroxy-2-(3-hydroxy-4-methoxyphenyl)-2,3-dihydrochromen-4-one                                                  | -3.8539         | -2.7924          | 1.0615           | -1.4012       | <b>2.4527</b> |
| Water                     | indomethacin                                                                                                               | -4.0000         | -4.1367          | -0.1367          | -1.5902       | <b>2.4098</b> |
| Ethanol                   | 2-aminoacetic acid                                                                                                         | -3.5229         | -0.6261          | 2.8967           | -1.1155       | <b>2.4073</b> |
| Water                     | gsk-B                                                                                                                      | -3.0969         | -4.9208          | -1.8239          | -0.8189       | <b>2.2781</b> |
| Hexane                    | 4-Hydroxybenzoic acid                                                                                                      | -3.3038         | -3.8327          | -0.5289          | -1.4269       | <b>1.8769</b> |
| Acetonitrile              | 3-pyridinecarboxylic acid                                                                                                  | -1.2558         | 1.5327           | 2.7885           | 0.5552        | <b>1.8110</b> |
| Formamide                 | ibuprofen                                                                                                                  | -0.1825         | 2.6561           | 2.8386           | 1.6192        | <b>1.8017</b> |
| Tetrahydrofuran           | hydrocortisone                                                                                                             | -1.9615         | 1.9971           | 3.9586           | -0.1635       | <b>1.7980</b> |
| Cyclohexane               | hydrocortisone                                                                                                             | -3.9700         | -3.6882          | 0.2818           | -2.2090       | <b>1.7610</b> |
| acetophenone              | ibuprofen                                                                                                                  | -0.2772         | 1.5601           | 1.8372           | 1.4695        | <b>1.7467</b> |
| Chloroform                | 2-hydroxypropane-1,2,3-tricarboxylic acid                                                                                  | -2.1549         | -4.0555          | -1.9006          | -0.4637       | <b>1.6912</b> |
| Tetrahydrofuran           | 2,2-dichloro-n-((1s,2r)-1-(fluoromethyl)-2-hydroxy-2-(4-(methylsulfonyl)phenyl)ethyl)acetamide                             | 1.3137          | 0.7614           | -0.5523          | -0.3557       | <b>1.6694</b> |
| Formamide                 | sclareol                                                                                                                   | -0.9996         | -0.1116          | 0.8880           | 0.6458        | <b>1.6454</b> |
| Ethyl Acetate             | lamivudine                                                                                                                 | -2.2007         | -0.2210          | 1.9797           | -0.5668       | <b>1.6338</b> |
| 1-Octanol                 | Sulfapyridine                                                                                                              | -1.8214         | 0.9644           | 2.7859           | -0.2375       | <b>1.5839</b> |
| Tetrahydrofuran           | sulfadiazine                                                                                                               | -3.1808         | -3.0555          | 0.1253           | -1.6037       | <b>1.5771</b> |
| Tetrahydrofuran           | sulfamethoxy-pyridazine                                                                                                    | -1.8083         | 0.1313           | 1.9395           | -0.2467       | <b>1.5616</b> |
| N,N-Dimethylformamide     | sulfadiazine                                                                                                               | 1.4178          | 0.5734           | -0.8444          | -0.1277       | <b>1.5455</b> |
| Water                     | naproxen                                                                                                                   | -3.1549         | -2.8136          | 0.3413           | -1.6369       | <b>1.5181</b> |
| Carbon Tetrachloride      | hydrocortisone                                                                                                             | -3.1899         | -2.5923          | 0.5977           | -1.6920       | <b>1.4979</b> |
| Water                     | d-(-)fructose                                                                                                              | 2.4680          | 1.6708           | -0.7972          | 1.0009        | <b>1.4672</b> |
| Acetonitrile              | glibenclamide                                                                                                              | -2.9626         | 0.2058           | 3.1683           | -1.5324       | <b>1.4302</b> |
| Water                     | lamivudine                                                                                                                 | 1.9289          | 2.4048           | 0.4759           | 0.5723        | <b>1.3566</b> |
| Acetonitrile              | n-(1-oxopentyl)-n-((2-(1h-tetrazol-5-yl)(1,1-biphenyl)-4-yl)methyl)-l-valine                                               | 1.1949          | 1.6570           | 0.4621           | -0.1415       | <b>1.3364</b> |
| Heptane                   | gsk-Z                                                                                                                      | 0.8732          | -0.7103          | -1.5834          | -0.4214       | <b>1.2946</b> |
| Ethanol                   | (benzyl-disulfanyl)methyl benzene                                                                                          | -0.1614         | 0.8082           | 0.9695           | 1.1326        | <b>1.2939</b> |
| Chloroform                | haloperidol                                                                                                                | 1.7776          | 1.7329           | -0.0447          | 0.5169        | <b>1.2607</b> |
| Heptane                   | gsk-B                                                                                                                      | 1.6317          | -0.7109          | -2.3426          | 0.3758        | <b>1.2559</b> |
| Methanol                  | piroxicam                                                                                                                  | -1.6716         | -0.2128          | 1.4588           | -0.4305       | <b>1.2411</b> |
| Hexane                    | mefenamic acid                                                                                                             | -0.4384         | -1.7544          | -1.3161          | -1.6592       | <b>1.2208</b> |
| Ethyl Formate             | salicylic acid                                                                                                             | 0.1536          | 1.6827           | 1.5290           | 1.3462        | <b>1.1926</b> |
| 2-Methoxy-2-Methylpropane | gsk-A                                                                                                                      | -2.1249         | -0.6711          | 1.4539           | -0.9407       | <b>1.1843</b> |
| Ethyl Acetate             | ascorbic acid                                                                                                              | -1.5850         | 1.5090           | 3.0940           | -0.4038       | <b>1.1812</b> |
| Diethylether              | diclofenac                                                                                                                 | -0.0741         | 1.5651           | 1.6392           | 1.1048        | <b>1.1789</b> |
| Hexane                    | acetanilide                                                                                                                | -2.6939         | -1.1767          | 1.5173           | -1.5264       | <b>1.1675</b> |
| 2-Propanol                | 3-((6-O-(6-deoxy-??-L-mannopyranosyl)-??-D-glucopyranosyl)oxy)-2-(3,4-dihydroxyphenol)-5,7-dihydroxy-4H-1-benzopyran-4-one | 0.2034          | -0.7320          | -0.9354          | -0.9518       | <b>1.1552</b> |
| Diethylether              | naproxen                                                                                                                   | -0.0306         | 1.5269           | 1.5576           | 1.1239        | <b>1.1545</b> |

## SI 2: Drip-feeding CV of RF-pure

Drip-feeding CV was also performed using the RF-pure method (i.e. excluding COSMO-RS predictions). The results were as expected, adding little to the interpretation and conclusions of an already dense presentation, and so are excluded from the main text; for completeness, they are presented here.

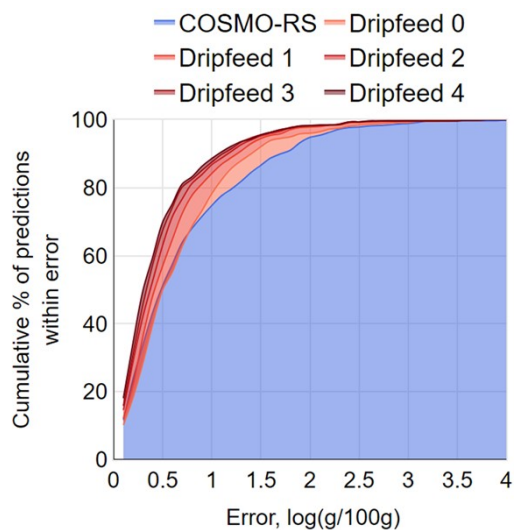

| Model      | RMSE | MAE  | FI   |
|------------|------|------|------|
| COSMO-RS   | 0.97 | 0.71 | NA   |
| Dripfeed 0 | 0.89 | 0.67 | 0.47 |
| Dripfeed 1 | 0.76 | 0.56 | 0.54 |
| Dripfeed 2 | 0.71 | 0.51 | 0.61 |
| Dripfeed 3 | 0.68 | 0.48 | 0.63 |
| Dripfeed 4 | 0.67 | 0.46 | 0.64 |

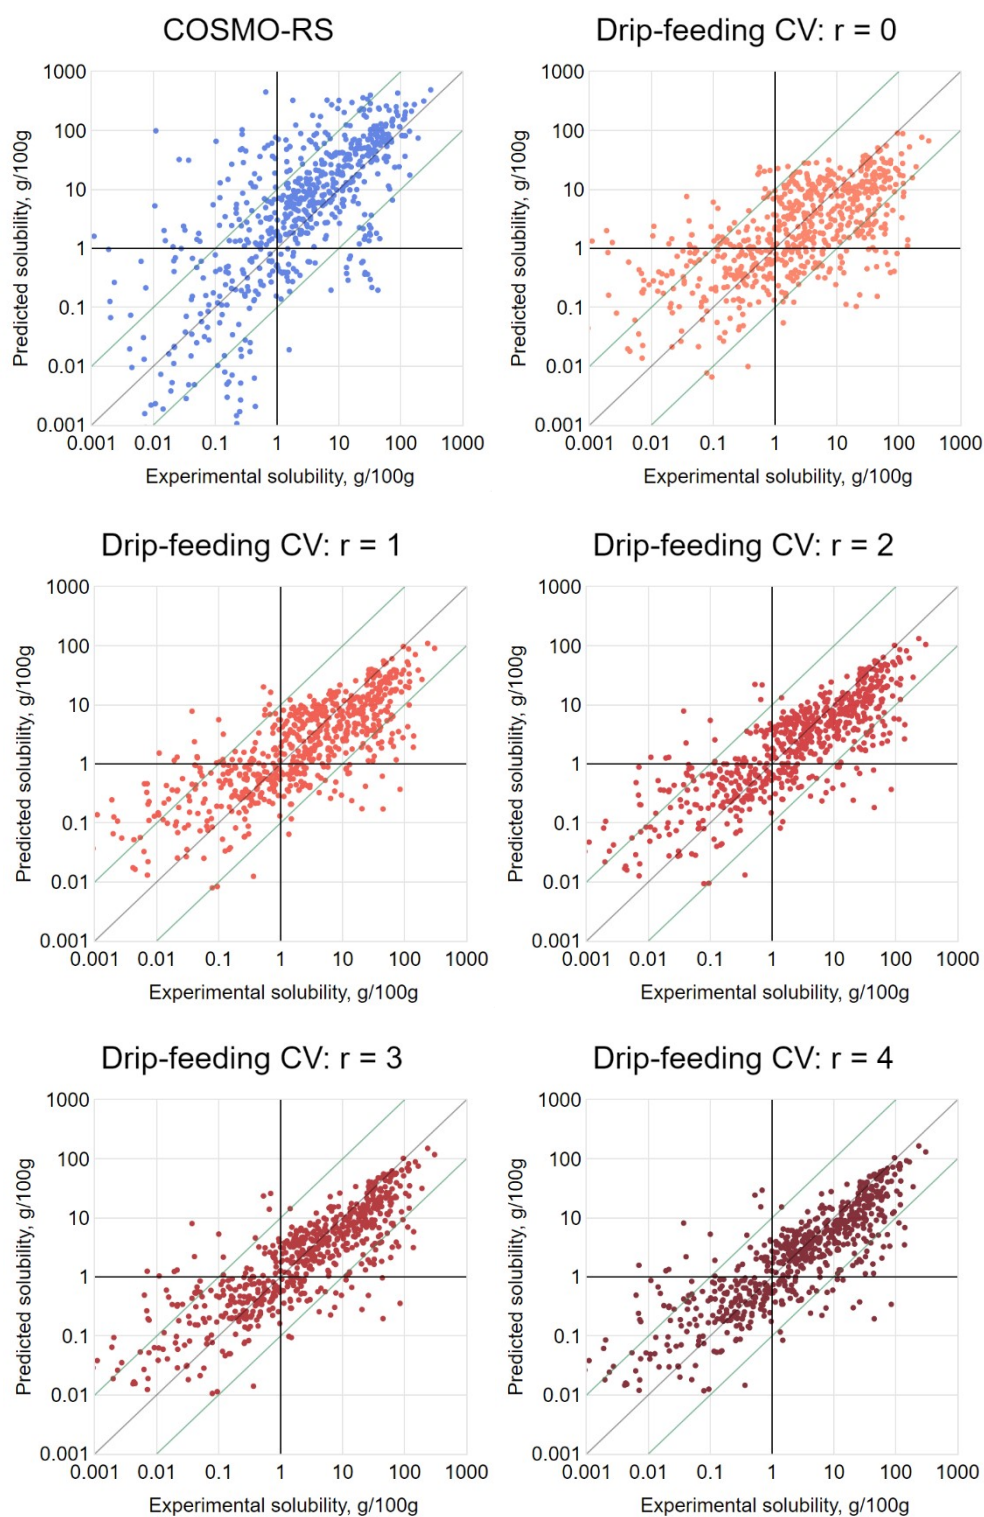

**Figure SI-2.** The results of drip-feeding CV for RF-pure, for  $r$  values of 0 to 4. Predictions were only made for solutes appearing in the dataset 5+ times to keep the plots comparable (658 of 714 instances). COSMO-RS prediction errors were recalculated for this subset for reference.

### SI 3: Solvent list

| Solvent ID | Solvent Name              |
|------------|---------------------------|
| 1          | 1,2-dichloroethane        |
| 2          | 1,4-dioxane               |
| 3          | 1-butanol                 |
| 4          | 1-heptanol                |
| 5          | 1-hexanol                 |
| 6          | 1-octanol                 |
| 7          | 1-pentanol                |
| 8          | 1-propanol                |
| 9          | 2-butanol                 |
| 10         | 2-butanone                |
| 11         | 2-methoxy-2-methylpropane |
| 12         | 2-methyltetrahydrofuran   |
| 13         | 2-propanol                |
| 14         | 4-methyl-2-pentanone      |
| 15         | acetone                   |
| 16         | acetonitrile              |
| 17         | acetophenone              |
| 18         | anisole                   |
| 19         | benzene                   |
| 20         | carbon tetrachloride      |
| 21         | chlorobenzene             |
| 22         | chloroform                |
| 23         | cyclohexane               |
| 24         | cyclohexanone             |
| 25         | dichloromethane           |
| 26         | dimethylformamide         |
| 27         | diethyl ether             |
| 28         | dodecane                  |
| 29         | ethanol                   |
| 30         | ethyl acetate             |
| 31         | ethyl formate             |
| 32         | ethylene glycol           |
| 33         | formamide                 |
| 34         | hexane                    |
| 35         | isobutanol                |
| 36         | isopentanol               |
| 37         | isopropyl acetate         |
| 38         | methanol                  |
| 39         | methyl acetate            |
| 40         | methylcyclohexane         |
| 41         | n-butyl acetate           |
| 42         | n-heptane                 |
| 43         | n-propyl acetate          |
| 44         | octane                    |
| 45         | propionic acid            |
| 46         | propylene glycol          |
| 47         | tetrahydrofuran           |
| 48         | toluene                   |
| 49         | water                     |

## SI 4: Solute list

| Solute ID | Chemical Name                                                        | $\Delta H_{\text{fus}}$<br>(kJ/mol) | Melting<br>point (°C) | Reference |
|-----------|----------------------------------------------------------------------|-------------------------------------|-----------------------|-----------|
| 1         | 2-(2-bromoethoxy)-1,3,5-trichlorobenzene                             | 24.05                               | 50.9                  | [1]       |
| 2         | 2-[(6-oxobenzo[c][2,1]benzoxaphosphinin-6-yl)methyl]butanedioic acid | 43.63                               | 188                   | [2]       |
| 3         | 2-aminopyridine                                                      | 15.31                               | 58.15                 | [3]       |
| 4         | 2-hydroxy-1,2-diphenylethanone                                       | 40.3                                | 135                   | [4]       |
| 5         | 3,4-dimethoxybenzoic acid                                            | 29.62                               | 179.97                | [3]       |
| 6         | 3-[bis(3-hydroxypropyl)phosphoryl]propan-1-ol                        | 34.21                               | 114.61                | [5]       |
| 7         | 4-aminobenzoic acid                                                  | 20.93                               | 186                   | [3]       |
| 8         | 4-hydroxy-3-methoxybenzaldehyde                                      | 21.36                               | 81.75                 | [3]       |
| 9         | 4-hydroxybenzoic acid                                                | 32.5                                | 216.25                | [6]       |
| 10        | acetanilide                                                          | 21.65                               | 114.3                 | [3]       |
| 11        | ascorbic acid                                                        | 19.72                               | 192                   | [3]       |
| 12        | benzoic acid                                                         | 17.452                              | 122.4                 | [3]       |
| 13        | benzyl disulfide                                                     | 44.69                               | 68.57                 | [7]       |
| 14        | butylparaben                                                         | 24.57                               | 67.57                 | [3]       |
| 15        | carbamazepine                                                        | 26.33                               | 190.2                 | [8]       |
| 16        | citric acid                                                          | 40.32                               | 153.85                | [9]       |
| 17        | D-fructose                                                           | 36.06                               | 104                   | [3]       |
| 18        | D-sorbitol                                                           | 35                                  | 92.7                  | [10]      |
| 19        | diclofenac                                                           | 40.4                                | 179.45                | [11]      |
| 20        | diphenylamine                                                        | 19.5                                | 325.6                 | [12]      |
| 21        | florfenicol                                                          | 18.98                               | 152                   | [13]      |
| 22        | frambinone                                                           | 22.75                               | 84.43                 | [14]      |
| 23        | fumaric acid                                                         | 33.3                                | 287                   | [15]      |
| 24        | glibenclamide                                                        | 52.9                                | 173.33                | [16]      |
| 25        | glycine                                                              | 28.4                                | 262                   | [15]      |
| 26        | haloperidol                                                          | 22.44                               | 151.5                 | [15]      |
| 27        | hesperetin                                                           | 35.9                                | 226.07                | [17]      |
| 28        | hexanedioic acid                                                     | 34.85                               | 153.4                 | [3]       |
| 29        | hydrocortisone                                                       | 33.9                                | 86.1                  | [18]      |
| 30        | hydroquinone                                                         | 27.11                               | 171.95                | [19]      |
| 31        | ibuprofen                                                            | 25.5                                | 74                    | [20]      |
| 32        | indomethacin                                                         | 36.85                               | 160.1                 | [21]      |
| 33        | iodopropynyl butylcarbamate                                          | 22.69                               | 68.26                 | [3]       |
| 34        | isoniazid                                                            | 28.15                               | 172.89                | [3]       |
| 35        | ketoprofen                                                           | 28.25                               | 94.5                  | [3]       |
| 36        | lamivudine                                                           | 20.84                               | 178.6                 | [22]      |
| 37        | lovastatin                                                           | 43.14                               | 172.35                | [23]      |
| 38        | maltol                                                               | 21.23                               | 160.25                | [24]      |
| 39        | mefenamic acid                                                       | 38.7                                | 230.5                 | [15]      |
| 40        | metacetamol                                                          | 28.8                                | 146.85                | [25]      |
| 41        | m-phthalic acid                                                      | 43.2                                | 344.26                | [26]      |
| 42        | N-(pyridin-3-ylmethylideneamino)pyridin-2-amine                      | 34                                  | 175.85                | [27]      |
| 43        | naproxen                                                             | 31.75                               | 155.85                | [3]       |
| 44        | nicotinic acid                                                       | 13.01                               | 236.01                | [28]      |
| 45        | octadecanoic acid                                                    | 56.4                                | 69.6                  | [29]      |
| 46        | oxolane-2,5-dione                                                    | 20.4                                | 119                   | [3]       |
| 47        | paracetamol                                                          | 28.1                                | 168.6                 | [30]      |
| 48        | phenacetin                                                           | 31.27                               | 135                   | [3]       |
| 49        | phenylphosphinic acid                                                | 12.8                                | 356                   | [31]      |
| 50        | piroxicam                                                            | 35.52                               | 202.1                 | [32]      |
| 51        | propylparaben                                                        | 28.01                               | 96.05                 | [3]       |
| 52        | pyridoxine                                                           | 31.15                               | 160.4                 | [33]      |
| 53        | pyrrolidine-2,5-dione                                                | 15.17                               | 128.7                 | [34]      |
| 54        | quercetin                                                            | 32.9                                | 318                   | [35]      |
| 55        | rutin                                                                | 82.3                                | 177                   | [17]      |
| 56        | salicylic acid                                                       | 23.2                                | 158.85                | [36]      |
| 57        | sclareol                                                             | 28.7                                | 103.3                 | [35]      |
| 58        | sulfadiazine                                                         | 44.3                                | 255.5                 | [15]      |
| 59        | sulfamethoxazole                                                     | 33.76                               | 167.5                 | [37]      |
| 60        | sulfamethoxypyridazine                                               | 22.3                                | 182.5                 | [15]      |
| 61        | sulfapyridine                                                        | 5.39                                | 192                   | [38]      |

|    |                                          |       |        |      |
|----|------------------------------------------|-------|--------|------|
| 62 | testosterone                             | 28.2  | 426.45 | [39] |
| 63 | testosterone propionate                  | 22.14 | 120    | [15] |
| 64 | theophylline                             | 30.91 | 273.1  | [40] |
| 65 | triclosan                                | 17.76 | 57.95  | [3]  |
| 66 | trimethoprim                             | 49.8  | 472.85 | [39] |
| 67 | tris(1,2-dioxyphenyl)cyclotriphosphazene | 19.54 | 249.05 | [41] |
| 68 | valsartan                                | 11.9  | 358.14 | [42] |
| 69 | gsk-Q                                    | 58.42 | 242    | *    |
| 70 | gsk-A                                    | 18.59 | 245.7  | *    |
| 71 | gsk-H                                    | 33.14 | 147    | *    |
| 72 | gsk-S                                    | 18.98 | 52.7   | *    |
| 73 | gsk-Z                                    | 27.99 | 161.4  | *    |
| 74 | gsk-E                                    | 33.04 | 202    | *    |
| 75 | gsk-B                                    | 32.06 | 225    | *    |

\* Melting temperature and fusion enthalpy were obtained from Differential Scanning Calorimetry with a TA Instruments Q100 DSC, using a 10°C/min ramp and a maximum temperature of 300°C per default for a DSC scan. Solute identity withheld due to commercial sensitivity.

## SI 5: Solubility Dataset

The following table is also available as a .csv file.

| Solute id | Solute Name                                                          | Solvent id | Solvent Name    | Solubility (g/100g) | Reference |
|-----------|----------------------------------------------------------------------|------------|-----------------|---------------------|-----------|
| 1         | 2-(2-bromoethoxy)-1,3,5-trichlorobenzene                             | 8          | 1-propanol      | 6.6716              | [43]      |
|           |                                                                      | 13         | 2-propanol      | 6.0484              |           |
|           |                                                                      | 15         | acetone         | 89.6024             |           |
|           |                                                                      | 16         | acetonitrile    | 23.2484             |           |
|           |                                                                      | 29         | ethanol         | 7.2141              |           |
|           |                                                                      | 38         | methanol        | 8.5503              |           |
|           |                                                                      | 42         | n-heptane       | 27.822              |           |
| 2         | 2-[(6-oxobenzo[c][2,1]benzoxaphosphinin-6-yl)methyl]butanedioic acid | 2          | 1,4-dioxane     | 0.7695**            | [44]      |
|           |                                                                      | 8          | 1-propanol      | 1.5078              |           |
|           |                                                                      | 19         | benzene         | 0.1463              |           |
|           |                                                                      | 23         | cyclohexane     | 0.0947              |           |
|           |                                                                      | 29         | ethanol         | 3.1778              |           |
|           |                                                                      | 30         | ethyl acetate   | 0.4564              |           |
|           |                                                                      | 38         | methanol        | 6.2608              |           |
|           |                                                                      | 47         | tetrahydrofuran | 1.7834              |           |
| 3         | 2-aminopyridine                                                      | 15         | acetone         | 85.515              | [19]      |
|           |                                                                      | 22         | chloroform      | 32.761              |           |
|           |                                                                      | 29         | ethanol         | 121.1282            |           |
|           |                                                                      | 30         | ethyl acetate   | 48.0374             |           |
|           |                                                                      | 41         | n-butyl acetate | 25.0209             |           |
| 4         | 2-hydroxy-1,2-diphenylethanone                                       | 3          | 1-butanol       | 0.6699              | [45]      |
|           |                                                                      | 8          | 1-propanol      | 0.828               |           |
|           |                                                                      | 13         | 2-propanol      | 0.5614              |           |
|           |                                                                      | 15         | acetone         | 4.6894              |           |
|           |                                                                      | 16         | acetonitrile    | 3.4742              |           |
|           |                                                                      | 23         | cyclohexane     | 0.3429              |           |
|           |                                                                      | 29         | ethanol         | 1.1093              |           |
|           |                                                                      | 30         | ethyl acetate   | 3.2595              |           |
|           |                                                                      | 35         | isobutanol      | 0.552               |           |
|           |                                                                      | 38         | methanol        | 1.6148              |           |
|           |                                                                      | 41         | n-butyl acetate | 1.9893              |           |
| 5         | 3,4-dimethoxybenzoic acid                                            | 3          | 1-butanol       | 1.4089              | [46]      |
|           |                                                                      | 8          | 1-propanol      | 2.014               |           |
|           |                                                                      | 10         | 2-butanone      | 3.0685              |           |
|           |                                                                      | 13         | 2-propanol      | 1.9219              |           |
|           |                                                                      | 29         | ethanol         | 2.948               |           |
|           |                                                                      | 30         | ethyl acetate   | 1.4995              |           |
|           |                                                                      | 35         | isobutanol      | 1.0118              |           |
| 39        | methyl acetate                                                       | 1.9832     |                 |                     |           |



|    |                                               |         |                           |         |      |
|----|-----------------------------------------------|---------|---------------------------|---------|------|
| 6  | 3-[bis(3-hydroxypropyl)phosphoryl]propan-1-ol | 3       | 1-butanol                 | 3.3616  | [5]  |
|    |                                               | 8       | 1-propanol                | 14.2959 |      |
|    |                                               | 13      | 2-propanol                | 5.8822  |      |
|    |                                               | 15      | acetone                   | 0.3903  |      |
|    |                                               | 29      | ethanol                   | 11.2647 |      |
|    |                                               | 35      | isobutanol                | 4.716   |      |
|    |                                               | 38      | methanol                  | 38.9079 |      |
| 7  | 4-aminobenzoic acid                           | 2       | 1,4-dioxane               | 11.712  | [47] |
|    |                                               | 3       | 1-butanol                 | 5.9958  |      |
|    |                                               | 4       | 1-heptanol                | 2.7498  |      |
|    |                                               | 5       | 1-hexanol                 | 3.6734  |      |
|    |                                               | 6       | 1-octanol                 | 2.2456  |      |
|    |                                               | 7       | 1-pentanol                | 4.2021  |      |
|    |                                               | 9       | 2-butanol                 | 5.3453  |      |
|    |                                               | 13      | 2-propanol                | 7.5876  | [48] |
|    |                                               | 15      | acetone                   | 12.433  |      |
|    |                                               | 19      | benzene                   | 0.0702  | [49] |
|    |                                               | 29      | ethanol                   | 15.8719 | [47] |
|    |                                               | 35      | isobutanol                | 3.2973  |      |
|    |                                               | 38      | methanol                  | 21.5602 | [50] |
| 47 | tetrahydrofuran                               | 32.5448 |                           |         |      |
| 49 | water                                         | 0.5409  |                           |         |      |
| 8  | 4-hydroxy-3-methoxybenzaldehyde               | 8       | 1-propanol                | 36.7084 | [51] |
|    |                                               | 29      | ethanol                   | 274.41  | [52] |
|    |                                               | 49      | water                     | 0.9917  | [53] |
| 9  | 4-hydroxybenzoic acid                         | 6       | 1-octanol                 | 17.1225 | [54] |
|    |                                               | 13      | 2-propanol                | 34.4479 | [20] |
|    |                                               | 14      | 4-methyl-2-pentanone      | 15.2063 |      |
|    |                                               | 22      | chloroform                | 0.0191  | [55] |
|    |                                               | 29      | ethanol                   | 40.0603 | [56] |
|    |                                               | 30      | ethyl acetate             | 12.4719 |      |
|    |                                               | 34      | hexane                    | 0.0005  | [54] |
|    |                                               | 38      | methanol                  | 54.2084 | [56] |
|    |                                               | 48      | toluene                   | 0.1651  | [20] |
| 49 | water                                         | 0.744   | [57]                      |         |      |
| 10 | acetanilide                                   | 6       | 1-octanol                 | 17.8864 | [54] |
|    |                                               | 11      | 2-methoxy-2-methylpropane | 3.025   | #    |
|    |                                               | 13      | 2-propanol                | 19.57   |      |
|    |                                               | 14      | 4-methyl-2-pentanone      | 13.1    |      |
|    |                                               | 16      | acetonitrile              | 21.435  |      |
|    |                                               | 18      | anisole                   | 3       |      |
|    |                                               | 22      | chloroform                | 16.8501 | [58] |
|    |                                               | 23      | cyclohexane               | 0.0339  | [59] |
|    |                                               | 28      | dodecane                  | 0.19    | #    |
|    |                                               | 29      | ethanol                   | 33.2195 |      |
|    |                                               | 34      | hexane                    | 0.002   | [54] |
|    |                                               | 36      | isopentanol               | 16.5567 | #    |
|    |                                               | 37      | isopropyl acetate         | 8.955   |      |
|    |                                               | 42      | n-heptane                 | 0.06    |      |
|    |                                               | 48      | toluene                   | 0.845   |      |
| 49 | water                                         | 0.3313  |                           |         |      |
| 11 | ascorbic acid                                 | 13      | 2-propanol                | 0.1846  | [60] |
|    |                                               | 16      | acetonitrile              | 0.103   |      |
|    |                                               | 29      | ethanol                   | 1.0475  |      |
|    |                                               | 30      | ethyl acetate             | 0.026   |      |
|    |                                               | 49      | water                     | 32.3572 |      |
| 12 | benzoic acid                                  | 1       | 1,2-dichloroethane        | 9.2173  | [61] |
|    |                                               | 3       | 1-butanol                 | 41.9647 | [62] |
|    |                                               | 5       | 1-hexanol                 | 30.0675 |      |
|    |                                               | 6       | 1-octanol                 | 13.8886 |      |
|    |                                               | 7       | 1-pentanol                | 40.4525 |      |
|    |                                               | 9       | 2-butanol                 | 39.9084 | [63] |
|    |                                               | 13      | 2-propanol                | 48.8187 | [61] |
|    |                                               | 16      | acetonitrile              | 16.9477 | [64] |
|    |                                               | 19      | benzene                   | 11.569  | [61] |
|    |                                               | 20      | carbon tetrachloride      | 4.1257  |      |
| 21 | chlorobenzene                                 | 10.2347 |                           |         |      |

|    |                  |    |                    |          |      |
|----|------------------|----|--------------------|----------|------|
|    |                  | 22 | chloroform         | 15.0566  |      |
|    |                  | 23 | cyclohexane        | 1.4953   |      |
|    |                  | 27 | diethyl ether      | 37.0771  |      |
|    |                  | 29 | ethanol            | 57.7567  |      |
|    |                  | 32 | ethylene glycol    | 19.0798  |      |
|    |                  | 33 | formamide          | 48.7885  |      |
|    |                  | 34 | hexane             | 1.3592   |      |
|    |                  | 35 | isobutanol         | 29.6238  |      |
|    |                  | 38 | methanol           | 74.3314  |      |
|    |                  | 41 | n-butyl acetate    | 21.5181  |      |
|    |                  | 42 | n-heptane          | 1.4428   |      |
|    |                  | 45 | propionic acid     | 38.3433  |      |
| 13 | benzyl disulfide | 22 | chloroform         | 54.3717  | [65] |
|    |                  | 29 | ethanol            | 0.6897** |      |
|    |                  | 30 | ethyl acetate      | 29.7846  |      |
|    |                  | 34 | hexane             | 2.1299   |      |
|    |                  | 48 | toluene            | 41.324** |      |
| 14 | butylparaben     | 3  | 1-butanol          | 149.9717 | [66] |
|    |                  | 5  | 1-hexanol          | 111.1637 |      |
|    |                  | 6  | 1-octanol          | 73.7917  |      |
|    |                  | 29 | ethanol            | 237.1531 |      |
|    |                  | 38 | methanol           | 306.7349 |      |
| 15 | carbamazepine    | 3  | 1-butanol          | 1.7086   | [67] |
|    |                  | 10 | 2-butanone         | 3.4286   |      |
|    |                  | 13 | 2-propanol         | 1.2675   |      |
|    |                  | 15 | acetone            | 1.5171   |      |
|    |                  | 16 | acetonitrile       | 4.1141   |      |
|    |                  | 22 | chloroform         | 11.3271  | [68] |
|    |                  | 25 | dichloromethane    | 11.9245  |      |
|    |                  | 29 | ethanol            | 3.0925   |      |
|    |                  | 30 | ethyl acetate      | 1.1863   |      |
|    |                  | 38 | methanol           | 9.7092   |      |
| 16 | citric acid      | 2  | 1,4-dioxane        | 30.8055  | [69] |
|    |                  | 3  | 1-butanol          | 23.4759  | [70] |
|    |                  | 7  | 1-pentanol         | 14.0859  | [69] |
|    |                  | 22 | chloroform         | 0.007    | [71] |
|    |                  | 29 | ethanol            | 73.7287  | [72] |
|    |                  | 30 | ethyl acetate      | 1.3475   |      |
|    |                  | 32 | ethylene glycol    | 66.575   |      |
|    |                  | 33 | formamide          | 61.623   | [69] |
|    |                  | 38 | methanol           | 94.459   |      |
|    |                  | 46 | propylene glycol   | 11.3393  |      |
|    |                  | 49 | water              | 140.9947 | [73] |
| 17 | D-fructose       | 29 | ethanol            | 1.7238   | [74] |
|    |                  | 38 | methanol           | 13.4464  |      |
|    |                  | 49 | water              | 293.7709 | [75] |
| 18 | D-Sorbitol       | 3  | 1-butanol          | 0.2202   |      |
|    |                  | 8  | 1-propanol         | 0.3758   |      |
|    |                  | 15 | acetone            | 0.1199   | [76] |
|    |                  | 16 | acetonitrile       | 0.0923   |      |
|    |                  | 38 | methanol           | 3.3472   |      |
| 19 | diclofenac       | 1  | 1,2-dichloroethane | 1.2109   |      |
|    |                  | 2  | 1,4-dioxane        | 39.6463  |      |
|    |                  | 6  | 1-octanol          | 3.4726   |      |
|    |                  | 7  | 1-pentanol         | 4.3796   |      |
|    |                  | 15 | acetone            | 15.8773  |      |
|    |                  | 17 | acetophenone       | 11.5429  |      |
|    |                  | 19 | benzene            | 1.0342   |      |
|    |                  | 21 | chlorobenzene      | 0.9717   |      |
|    |                  | 22 | chloroform         | 2.3518   | [48] |
|    |                  | 23 | cyclohexane        | 0.0216   |      |
|    |                  | 27 | diethyl ether      | 0.8432   |      |
|    |                  | 29 | ethanol            | 5.6614   |      |
|    |                  | 30 | ethyl acetate      | 7.8747   |      |
|    |                  | 31 | ethyl formate      | 1.6176   |      |
|    |                  | 32 | ethylene glycol    | 0.811    |      |
|    |                  | 33 | formamide          | 1.1586   |      |

|    |                  |    |                      |          |      |
|----|------------------|----|----------------------|----------|------|
|    |                  | 38 | methanol             | 5.4569   |      |
|    |                  | 42 | n-heptane            | 0.0177   |      |
|    |                  | 45 | propionic acid       | 3.9621   |      |
|    |                  | 46 | propylene glycol     | 1.9213   |      |
| 20 | diphenylamine    | 3  | 1-butanol            | 43.0394  | [63] |
|    |                  | 9  | 2-butanol            | 41.6423  |      |
|    |                  | 36 | isopentanol          | 28.781   |      |
| 21 | Florfenicol      | 3  | 1-butanol            | 0.5419   | [13] |
|    |                  | 8  | 1-propanol           | 1.2855   |      |
|    |                  | 13 | 2-propanol           | 0.7956   |      |
|    |                  | 29 | ethanol              | 2.4125   |      |
|    |                  | 35 | isobutanol           | 0.2963   |      |
|    |                  | 36 | isopentanol          | 0.3901   |      |
|    |                  | 38 | methanol             | 12.9488  | [77] |
|    |                  | 45 | propionic acid       | 0.272    | [13] |
|    |                  | 47 | tetrahydrofuran      | 20.5918  | [78] |
|    |                  | 49 | water                | 0.1092   |      |
| 22 | frambinone       | 3  | 1-butanol            | 57.8619  | [14] |
|    |                  | 8  | 1-propanol           | 60.1412  |      |
|    |                  | 9  | 2-butanol            | 37.6299  |      |
|    |                  | 13 | 2-propanol           | 67.3298  |      |
|    |                  | 15 | acetone              | 116.2637 |      |
|    |                  | 29 | ethanol              | 96.8699  |      |
|    |                  | 30 | ethyl acetate        | 39.7248  |      |
|    |                  | 39 | methyl acetate       | 49.3838  |      |
| 23 | fumaric acid     | 19 | benzene              | 0.0045   | [79] |
|    |                  | 22 | chloroform           | 0.02     |      |
|    |                  | 49 | water                | 0.6998   |      |
| 24 | glibenclamide    | 3  | 1-butanol            | 0.0043   | [80] |
|    |                  | 13 | 2-propanol           | 0.002    |      |
|    |                  | 14 | 4-methyl-2-pentanone | 0.0501   |      |
|    |                  | 15 | acetone              | 0.0105   |      |
|    |                  | 16 | acetonitrile         | 0.0011   |      |
|    |                  | 29 | ethanol              | 0.0023   |      |
|    |                  | 30 | ethyl acetate        | 0.0323   |      |
|    |                  | 38 | methanol             | 0.0019   |      |
| 25 | glycine          | 26 | dimethylformamide    | 0.0464   | [81] |
|    |                  | 29 | ethanol              | 0.0003   |      |
|    |                  | 38 | methanol             | 0.0004   | [82] |
|    |                  | 49 | water                | 24.0616  |      |
| 26 | haloperidol      | 2  | 1,4-dioxane          | 2.4154   |      |
|    |                  | 3  | 1-butanol            | 3.971    |      |
|    |                  | 7  | 1-pentanol           | 1.3946   |      |
|    |                  | 13 | 2-propanol           | 7.3404   |      |
|    |                  | 15 | acetone              | 2.0059   |      |
|    |                  | 19 | benzene              | 5.2437   |      |
|    |                  | 22 | chloroform           | 59.9185  |      |
|    |                  | 26 | dimethylformamide    | 21.6883  |      |
|    |                  | 29 | ethanol              | 4.6772   |      |
|    |                  | 30 | ethyl acetate        | 4.3397   |      |
|    |                  | 38 | methanol             | 1.7975   |      |
|    |                  | 41 | n-butyl acetate      | 1.6084   |      |
|    |                  | 46 | propylene glycol     | 0.445    |      |
| 27 | Hesperetin       | 3  | 1-butanol            | 1.3808   | [84] |
|    |                  | 15 | acetone              | 12.9931  | [85] |
|    |                  | 16 | acetonitrile         | 1.5202   |      |
|    |                  | 29 | ethanol              | 2.9156   |      |
|    |                  | 30 | ethyl acetate        | 2.3881   |      |
|    |                  | 38 | methanol             | 3.5678   |      |
|    |                  | 49 | water                | 0.0001   |      |
|    |                  | 49 | water                | 0.0001   | [84] |
| 28 | hexanedioic acid | 3  | 1-butanol            | 5.9939   | [86] |
|    |                  | 13 | 2-propanol           | 7.3003   | [87] |
|    |                  | 15 | acetone              | 4.2448   | [88] |
|    |                  | 19 | benzene              | 0.02     | [87] |
|    |                  | 22 | chloroform           | 0.2565   | [88] |
|    |                  | 30 | ethyl acetate        | 0.8233   | [89] |
|    |                  | 48 | toluene              | 0.0072   | [88] |

|    |                             |          |                      |          |       |
|----|-----------------------------|----------|----------------------|----------|-------|
|    |                             | 49       | water                | 2.3701   | [90]  |
| 29 | hydrocortisone              | 6        | 1-octanol            | 0.4115   | [91]  |
|    |                             | 19       | benzene              | 0.0148   |       |
|    |                             | 20       | carbon tetrachloride | 0.0006   |       |
|    |                             | 22       | chloroform           | 0.2721   |       |
|    |                             | 23       | cyclohexane          | 0.0001   |       |
|    |                             | 30       | ethyl acetate        | 0.3118   |       |
|    |                             | 34       | hexane               | 0.0005   |       |
|    |                             | 37       | isopropyl acetate    | 0.1604   |       |
|    |                             | 39       | methyl acetate       | 0.6285   |       |
|    |                             | 41       | n-butyl acetate      | 0.2175   |       |
|    |                             | 46       | propylene glycol     | 1.6094   |       |
| 47 | tetrahydrofuran             | 0.0109   |                      |          |       |
| 30 | hydroquinone                | 29       | ethanol              | 56.5762  | [92]  |
|    |                             | 41       | n-butyl acetate      | 12.5969  |       |
| 31 | ibuprofen                   | 2        | 1,4-dioxane          | 9.0429   | [93]  |
|    |                             | 7        | 1-pentanol           | 38.6346  | [94]  |
|    |                             | 9        | 2-butanol            | 71.3233  |       |
|    |                             | 13       | 2-propanol           | 104.5087 |       |
|    |                             | 14       | 4-methyl-2-pentanone | 62.75    | [95]  |
|    |                             | 15       | acetone              | 191.9609 | [93]  |
|    |                             | 17       | acetophenone         | 0.5282   |       |
|    |                             | 19       | benzene              | 24.4442  |       |
|    |                             | 21       | chlorobenzene        | 3.7644   |       |
|    |                             | 22       | chloroform           | 58.7729  |       |
|    |                             | 23       | cyclohexane          | 43.9589  |       |
|    |                             | 26       | dimethylformamide    | 41.3183  |       |
|    |                             | 27       | diethyl ether        | 6.3261   |       |
|    |                             | 29       | ethanol              | 41.0192  |       |
|    |                             | 30       | ethyl acetate        | 117.8434 |       |
|    |                             | 31       | ethyl formate        | 26.1583  |       |
|    |                             | 32       | ethylene glycol      | 6.4508   |       |
|    |                             | 33       | formamide            | 0.6569   |       |
|    |                             | 34       | hexane               | 9.61     | [95]  |
|    |                             | 35       | isobutanol           | 70.0541  | [94]  |
|    |                             | 38       | methanol             | 16.2917  | [93]  |
| 41 | n-butyl acetate             | 58.89    | [95]                 |          |       |
| 42 | n-heptane                   | 12.2085  | [93]                 |          |       |
| 45 | propionic acid              | 73.9792  |                      |          |       |
| 46 | propylene glycol            | 25.4709  |                      |          |       |
| 47 | tetrahydrofuran             | 57.446** | [20]                 |          |       |
| 48 | toluene                     | 65.17    | [95]                 |          |       |
| 32 | indomethacin                | 2        | 1,4-dioxane          | 11.7761  | [96]  |
|    |                             | 35       | isobutanol           | 1.1973   | [97]  |
|    |                             | 49       | water                | 0.0001   | [98]  |
| 33 | iodopropynyl butylcarbamate | 3        | 1-butanol            | 90.1139  | [99]  |
|    |                             | 4        | 1-heptanol           | 44.3722  |       |
|    |                             | 5        | 1-hexanol            | 56.7472  |       |
|    |                             | 7        | 1-pentanol           | 71.9053  |       |
|    |                             | 8        | 1-propanol           | 119.1368 |       |
|    |                             | 29       | ethanol              | 167.1137 |       |
| 34 | isoniazid                   | 15       | acetone              | 1.8612** | [100] |
|    |                             | 29       | ethanol              | 1.4307** |       |
|    |                             | 30       | ethyl acetate        | 0.2228** |       |
|    |                             | 38       | methanol             | 4.1301** |       |
| 35 | ketoprofen                  | 3        | 1-butanol            | 32.6079  | [101] |
|    |                             | 4        | 1-heptanol           | 15.8149  | [101] |
|    |                             | 5        | 1-hexanol            | 22.053   | [102] |
|    |                             | 6        | 1-octanol            | 14.494   |       |
|    |                             | 7        | 1-pentanol           | 24.2685  |       |
|    |                             | 8        | 1-propanol           | 35.8786  |       |
|    |                             | 9        | 2-butanol            | 59.5923  |       |
|    |                             | 13       | 2-propanol           | 61.4996  |       |
|    |                             | 27       | diethyl ether        | 38.149   |       |
|    |                             | 29       | ethanol              | 41.6094  |       |
|    |                             | 30       | ethyl acetate        | 52.1339  |       |
| 35 | isobutanol                  | 38.4992  |                      |          |       |

|    |                  |        |                           |          |       |       |
|----|------------------|--------|---------------------------|----------|-------|-------|
|    |                  | 38     | methanol                  | 32.7219  | [101] |       |
| 36 | lamivudine       | 3      | 1-butanol                 | 0.6667   | [103] |       |
|    |                  | 8      | 1-propanol                | 0.8966   |       |       |
|    |                  | 9      | 2-butanol                 | 0.495    |       |       |
|    |                  | 13     | 2-propanol                | 0.6242   |       |       |
|    |                  | 15     | acetone                   | 0.1188   |       |       |
|    |                  | 16     | acetonitrile              | 0.218    | [104] |       |
|    |                  | 26     | dimethylformamide         | 20.258   | [103] |       |
|    |                  | 29     | ethanol                   | 1.4449   |       |       |
|    |                  | 30     | ethyl acetate             | 0.0063   |       |       |
|    |                  | 38     | methanol                  | 3.5777   |       |       |
|    |                  | 47     | tetrahydrofuran           | 0.4303   | [104] |       |
| 49 | water            | 84.9   | [103]                     |          |       |       |
| 37 | lovastatin       | 5      | 1-hexanol                 | 1.8094   | [105] |       |
|    |                  | 6      | 1-octanol                 | 1.2906** | [23]  |       |
|    |                  | 10     | 2-butanone                | 6.5327   | [105] |       |
|    |                  | 15     | acetone                   | 8.6955   | [106] |       |
|    |                  | 29     | ethanol                   | 3.1099   |       |       |
|    |                  | 30     | ethyl acetate             | 2.6248   | [105] |       |
|    |                  | 37     | isopropyl acetate         | 1.9784   | [106] |       |
|    |                  | 38     | methanol                  | 3.9857   | [105] |       |
|    |                  | 39     | methyl acetate            | 2.452    | [106] |       |
|    |                  | 41     | n-butyl acetate           | 1.8483   | [105] |       |
|    |                  | 43     | n-propyl acetate          | 2.3388   | [105] |       |
| 38 | maltol           | 1      | 1,2-dichloroethane        | 2.2567   | [24]  |       |
|    |                  | 3      | 1-butanol                 | 1.9829   |       |       |
|    |                  | 8      | 1-propanol                | 2.5101   |       |       |
|    |                  | 9      | 2-butanol                 | 1.9132   |       |       |
|    |                  | 13     | 2-propanol                | 2.1925   |       |       |
|    |                  | 15     | acetone                   | 2.9581   |       |       |
|    |                  | 16     | acetonitrile              | 3.3163   |       |       |
|    |                  | 29     | ethanol                   | 3.4651   |       |       |
|    |                  | 30     | ethyl acetate             | 2.2255   |       |       |
|    |                  | 35     | isobutanol                | 1.8524   |       |       |
|    |                  | 38     | methanol                  | 7.4185   |       |       |
|    |                  | 41     | n-butyl acetate           | 1.4032   |       |       |
|    |                  | 43     | n-propyl acetate          | 1.6238   |       |       |
| 39 | mefenamic acid   | 8      | 1-propanol                | 0.75     | [63]  |       |
|    |                  | 13     | 2-propanol                | 0.8046   | [107] |       |
|    |                  | 15     | acetone                   | 1.7271   | [108] |       |
|    |                  | 23     | cyclohexane               | 0.2583   | [107] |       |
|    |                  | 26     | dimethylformamide         | 5.743    |       |       |
|    |                  | 29     | ethanol                   | 0.997    |       |       |
|    |                  | 30     | ethyl acetate             | 1.0722   |       |       |
|    |                  | 34     | hexane                    | 0.3645   |       |       |
|    |                  | 42     | n-heptane                 | 0.2652   | [109] |       |
| 46 | propylene glycol | 0.1187 |                           |          |       |       |
| 40 | metacetamol      | 11     | 2-methoxy-2-methylpropane | 0.85     | #     |       |
|    |                  | 13     | 2-propanol                | 19.48    |       |       |
|    |                  | 14     | 4-methyl-2-pentanone      | 6.94     |       |       |
|    |                  | 16     | acetonitrile              | 8.05     |       |       |
|    |                  | 18     | anisole                   | 0.24     |       |       |
|    |                  | 28     | dodecane                  | 0.115    |       |       |
|    |                  | 37     | isopropyl acetate         | 2.455    |       |       |
|    |                  | 42     | n-heptane                 | 0.03     |       |       |
| 41 | m-phthalic acid  | 48     | toluene                   | 0.11     | [110] |       |
|    |                  | 3      | 1-butanol                 | 0.7574   |       |       |
|    |                  | 4      | 1-heptanol                | 0.4209   |       |       |
|    |                  | 5      | 1-hexanol                 | 0.4958   |       |       |
|    |                  | 6      | 1-octanol                 | 0.357    |       |       |
|    |                  | 7      | 1-pentanol                | 0.5984   |       |       |
|    |                  | 8      | 1-propanol                | 0.9983   |       |       |
|    |                  | 9      | 2-butanol                 | 0.8224   |       |       |
|    |                  | 13     | 2-propanol                | 1.1557   |       |       |
|    |                  | 15     | acetone                   | 5.9599   |       | [111] |
|    |                  | 30     | ethyl acetate             | 1.1083** |       | [110] |
| 35 | isobutanol       | 0.537  |                           |          |       |       |

|    |                                                 |        |                      |         |                 |         |       |
|----|-------------------------------------------------|--------|----------------------|---------|-----------------|---------|-------|
|    |                                                 | 36     | isopentanol          | 0.5519  |                 |         |       |
|    |                                                 | 38     | methanol             | 1.996   |                 |         |       |
| 42 | N-(pyridin-3-ylmethylideneamino)pyridin-2-amine | 6      | 1-octanol            | 1.7241  | [27]            |         |       |
|    |                                                 | 34     | hexane               | 0.0068  |                 |         |       |
|    |                                                 | 49     | water                | 0.0139  |                 |         |       |
|    |                                                 |        |                      |         |                 |         |       |
| 43 | naproxen                                        | 1      | 1,2-dichloroethane   | 3.1347  | [112]           |         |       |
|    |                                                 | 2      | 1,4-dioxane          | 30.3348 | [113]           |         |       |
|    |                                                 | 3      | 1-butanol            | 4.462   |                 |         |       |
|    |                                                 | 4      | 1-heptanol           | 3.8564  |                 |         |       |
|    |                                                 | 5      | 1-hexanol            | 3.8111  |                 |         |       |
|    |                                                 | 6      | 1-octanol            | 2.8823  |                 |         |       |
|    |                                                 | 7      | 1-pentanol           | 3.4459  |                 |         |       |
|    |                                                 | 9      | 2-butanol            | 4.4684  |                 |         |       |
|    |                                                 | 13     | 2-propanol           | 5.1804  |                 |         |       |
|    |                                                 |        |                      | 15      | acetone         | 29.4826 | [112] |
|    |                                                 |        |                      | 16      | acetonitrile    | 2.5355  | [114] |
|    |                                                 |        |                      | 17      | acetophenone    | 80.3036 | [112] |
|    |                                                 |        |                      | 19      | benzene         | 2.1507  |       |
|    |                                                 |        |                      | 21      | chlorobenzene   | 1.8352  |       |
|    |                                                 |        |                      | 22      | chloroform      | 6.0239  |       |
|    |                                                 |        |                      | 23      | cyclohexane     | 0.0328  |       |
|    |                                                 |        |                      | 27      | diethyl ether   | 0.9319  |       |
|    |                                                 |        |                      | 29      | ethanol         | 7.6115  | [114] |
|    |                                                 |        |                      | 30      | ethyl acetate   | 6.9764  |       |
|    |                                                 |        |                      | 31      | ethyl formate   | 4.1876  | [112] |
|    |                                                 |        |                      | 32      | ethylene glycol | 1.4335  |       |
|    |                                                 |        |                      | 33      | formamide       | 3.3655  | [113] |
|    |                                                 |        |                      | 35      | isobutanol      | 2.7074  |       |
|    |                                                 |        |                      | 38      | methanol        | 10.6326 | [112] |
|    |                                                 |        |                      | 39      | methyl acetate  | 8.7764  | [113] |
|    |                                                 |        |                      | 41      | n-butyl acetate | 4.7539  |       |
|    |                                                 |        |                      | 42      | n-heptane       | 0.0069  | [114] |
|    |                                                 |        |                      | 45      | propionic acid  | 9.1888  | [112] |
|    |                                                 | 46     | propylene glycol     | 2.3389  |                 |         |       |
|    |                                                 | 47     | tetrahydrofuran      | 52.7637 | [113]           |         |       |
|    |                                                 | 49     | water                | 0.0007  | [115]           |         |       |
| 44 | nicotinic acid                                  | 16     | acetonitrile         | 0.0555  | [116]           |         |       |
|    |                                                 | 27     | diethyl ether        | 0.1352  |                 |         |       |
|    |                                                 | 49     | water                | 1.6619  | [117]           |         |       |
| 45 | octadecanoic acid                               | 15     | acetone              | 3.8008  | [118]           |         |       |
|    |                                                 | 34     | hexane               | 2.4276  |                 |         |       |
|    |                                                 | 42     | n-heptane            | 1.5127  |                 |         |       |
| 46 | oxolane-2,5-dione                               | 13     | 2-propanol           | 14.3424 | [119]           |         |       |
|    |                                                 | 15     | acetone              | 28.6563 |                 |         |       |
|    |                                                 | 16     | acetonitrile         | 41.7409 |                 |         |       |
|    |                                                 | 30     | ethyl acetate        | 9.4886  |                 |         |       |
| 47 | paracetamol                                     | 2      | 1,4-dioxane          | 5.562   | [69]            |         |       |
|    |                                                 | 3      | 1-butanol            | 8.327   | [120]           |         |       |
|    |                                                 | 6      | 1-octanol            | 2.9397  | [54]            |         |       |
|    |                                                 | 7      | 1-pentanol           | 11.932  | [120]           |         |       |
|    |                                                 | 8      | 1-propanol           | 11.932  | [121]           |         |       |
|    |                                                 | 13     | 2-propanol           | 12.115  | [120]           |         |       |
|    |                                                 | 14     | 4-methyl-2-pentanone | 1.66    | [121]           |         |       |
|    |                                                 | 15     | acetone              | 9.938   | [120]           |         |       |
|    |                                                 | 16     | acetonitrile         | 2.754   |                 |         |       |
|    |                                                 | 18     | anisole              | 0.05    | [121]           |         |       |
|    |                                                 | 19     | benzene              | 0.0213  | [69]            |         |       |
|    |                                                 | 22     | chloroform           | 0.0405  |                 |         |       |
|    |                                                 | 23     | cyclohexane          | 0.0054  | [58]            |         |       |
|    |                                                 | 28     | dodecane             | 0.065   | [121]           |         |       |
|    |                                                 | 29     | ethanol              | 20.991  | [120]           |         |       |
|    |                                                 | 30     | ethyl acetate        | 0.945   |                 |         |       |
|    |                                                 | 33     | formamide            | 63.6745 | [69]            |         |       |
|    |                                                 | 34     | hexane               | 0.0007  | [54]            |         |       |
|    |                                                 | 36     | isopentanol          | 5.4872  | [121]           |         |       |
| 37 | isopropyl acetate                               | 0.75   |                      |         |                 |         |       |
| 38 | methanol                                        | 33.211 | [120]                |         |                 |         |       |

|    |                       |        |                    |          |       |
|----|-----------------------|--------|--------------------|----------|-------|
|    |                       | 45     | propionic acid     | 2.2925   | [69]  |
|    |                       | 46     | propylene glycol   | 25.8261  |       |
|    |                       | 47     | tetrahydrofuran    | 0.037    | [120] |
|    |                       | 48     | toluene            | 0.037    | [118] |
|    |                       | 49     | water              | 1.49     | [121] |
| 48 | phenacetin            | 2      | 1,4-dioxane        | 3.49     | [122] |
|    |                       | 3      | 1-butanol          | 6.9872   | [123] |
|    |                       | 7      | 1-pentanol         | 4.0384   |       |
|    |                       | 8      | 1-propanol         | 5.3587   |       |
|    |                       | 19     | benzene            | 0.4483   |       |
|    |                       | 22     | chloroform         | 5.2131   | [58]  |
|    |                       | 23     | cyclohexane        | 0.0218   | [123] |
|    |                       | 29     | ethanol            | 7.1486   |       |
|    |                       | 30     | ethyl acetate      | 2.3379   | [54]  |
|    |                       | 34     | hexane             | 0.0041   | [123] |
|    |                       | 38     | methanol           | 11.3327  | [122] |
| 47 | tetrahydrofuran       | 8.1868 |                    |          |       |
| 49 | phenylphosphinic acid | 38     | methanol           | 120.8774 | [31]  |
|    |                       | 48     | toluene            | 4.4432   |       |
|    |                       | 49     | water              | 7.5109   |       |
| 50 | piroxicam             | 1      | 1,2-dichloroethane | 2.9877   | [124] |
|    |                       | 2      | 1,4-dioxane        | 1.8678   |       |
|    |                       | 6      | 1-octanol          | 0.0763   |       |
|    |                       | 7      | 1-pentanol         | 0.093    |       |
|    |                       | 15     | acetone            | 1.6102   |       |
|    |                       | 17     | acetophenone       | 0.0564   |       |
|    |                       | 19     | benzene            | 0.0306   |       |
|    |                       | 21     | chlorobenzene      | 0.0207   |       |
|    |                       | 22     | chloroform         | 6.4167   |       |
|    |                       | 23     | cyclohexane        | 0.007    |       |
|    |                       | 26     | dimethylformamide  | 7.7252   |       |
|    |                       | 27     | diethyl ether      | 0.0226   |       |
|    |                       | 29     | ethanol            | 0.1016   |       |
|    |                       | 30     | ethyl acetate      | 0.9215   |       |
|    |                       | 31     | ethyl formate      | 3.9912   |       |
|    |                       | 32     | ethylene glycol    | 0.0747   |       |
|    |                       | 33     | formamide          | 0.3676   |       |
| 38 | methanol              | 0.0213 |                    |          |       |
| 42 | n-heptane             | 0.0045 |                    |          |       |
| 45 | propionic acid        | 0.7181 |                    |          |       |
| 46 | propylene glycol      | 0.1179 |                    |          |       |
| 51 | propylparaben         | 3      | 1-butanol          | 63.0751  | [66]  |
|    |                       | 5      | 1-hexanol          | 46.8818  |       |
|    |                       | 6      | 1-octanol          | 34.5933  |       |
|    |                       | 7      | 1-pentanol         | 50.47    |       |
|    |                       | 29     | ethanol            | 95.9628  |       |
|    |                       | 38     | methanol           | 116.8251 |       |
| 52 | pyridoxine            | 15     | acetone            | 0.3704   | [33]  |
|    |                       | 29     | ethanol            | 1.3379   |       |
|    |                       | 38     | methanol           | 8.5035   |       |
|    |                       | 47     | tetrahydrofuran    | 0.5645   |       |
| 53 | pyrrolidine-2,5-dione | 13     | 2-propanol         | 2.9882   | [34]  |
|    |                       | 15     | acetone            | 14.8157  |       |
|    |                       | 29     | ethanol            | 5.4247   |       |
|    |                       | 30     | ethyl acetate      | 3.8622   |       |
|    |                       | 38     | methanol           | 18.3454  |       |
|    |                       | 47     | tetrahydrofuran    | 11.4643  |       |
| 54 | quercetin             | 8      | 1-propanol         | 2.6694   | [35]  |
|    |                       | 13     | 2-propanol         | 2.7749   |       |
|    |                       | 16     | acetonitrile       | 1.1122   |       |
|    |                       | 29     | ethanol            | 3.3058   |       |
| 55 | rutin                 | 3      | 1-butanol          | 0.2851   | [125] |
|    |                       | 8      | 1-propanol         | 1.8238   |       |
|    |                       | 13     | 2-propanol         | 1.5975   |       |
|    |                       | 15     | acetone            | 0.285    |       |
|    |                       | 29     | ethanol            | 5.81     |       |

|    |                        |         |                      |         |       |
|----|------------------------|---------|----------------------|---------|-------|
|    |                        | 30      | ethyl acetate        | 0.7527  |       |
|    |                        | 38      | methanol             | 5.7985  |       |
| 56 | salicylic acid         | 1       | 1,2-dichloroethane   | 1.0663  | [48]  |
|    |                        | 3       | 1-butanol            | 36.7155 | [126] |
|    |                        | 6       | 1-octanol            | 24.235  | [54]  |
|    |                        | 6       | 1-octanol            | 24.235  | [127] |
|    |                        | 7       | 1-pentanol           | 28.6855 | [48]  |
|    |                        | 9       | 2-butanol            | 42.8331 |       |
|    |                        | 13      | 2-propanol           | 50.0766 | [126] |
|    |                        | 16      | acetonitrile         | 10.2057 | [56]  |
|    |                        | 17      | acetophenone         | 20.7246 |       |
|    |                        | 19      | benzene              | 0.9691  | [48]  |
|    |                        | 20      | carbon tetrachloride | 0.2999  | [128] |
|    |                        | 21      | chlorobenzene        | 0.8274  |       |
|    |                        | 22      | chloroform           | 0.1689  | [48]  |
|    |                        | 23      | cyclohexane          | 0.1269  | [129] |
|    |                        | 27      | diethyl ether        | 33.4357 | [48]  |
|    |                        | 29      | ethanol              | 50.8461 | [130] |
|    |                        | 31      | ethyl formate        | 1.4244  |       |
|    |                        | 32      | ethylene glycol      | 20.6973 | [48]  |
|    |                        | 33      | formamide            | 13.6578 |       |
|    |                        | 34      | hexane               | 0.0787  | [54]  |
|    |                        | 35      | isobutanol           | 31.0935 | [126] |
|    |                        | 38      | methanol             | 63.2867 | [56]  |
| 41 | n-butyl acetate        | 18.7647 | [126]                |         |       |
| 42 | n-heptane              | 0.154   |                      |         |       |
| 45 | propionic acid         | 13.2051 | [48]                 |         |       |
| 46 | propylene glycol       | 23.2643 |                      |         |       |
| 57 | sclareol               | 8       | 1-propanol           | 13.1222 |       |
|    |                        | 15      | acetone              | 17.9245 |       |
|    |                        | 16      | acetonitrile         | 4.0583  |       |
|    |                        | 23      | cyclohexane          | 21.5067 |       |
|    |                        | 26      | dimethylformamide    | 5.042   |       |
|    |                        | 29      | ethanol              | 15.2074 | [131] |
|    |                        | 30      | ethyl acetate        | 12.9944 |       |
|    |                        | 33      | formamide            | 0.1001  |       |
|    |                        | 34      | hexane               | 1.626   |       |
|    |                        | 38      | methanol             | 7.6426  |       |
| 48 | toluene                | 15.3403 |                      |         |       |
| 58 | sulfadiazine           | 2       | 1,4-dioxane          | 0.1406  | [32]  |
|    |                        | 3       | 1-butanol            | 0.0107  |       |
|    |                        | 6       | 1-octanol            | 0.0027  | [132] |
|    |                        | 7       | 1-pentanol           | 0.0075  |       |
|    |                        | 13      | 2-propanol           | 0.0131  |       |
|    |                        | 15      | acetone              | 0.4495  | [32]  |
|    |                        | 19      | benzene              | 0.0009  |       |
|    |                        | 26      | dimethylformamide    | 26.1715 |       |
|    |                        | 29      | ethanol              | 0.0417  | [132] |
|    |                        | 30      | ethyl acetate        | 0.0338  |       |
|    |                        | 32      | ethylene glycol      | 0.1293  |       |
|    |                        | 35      | isobutanol           | 0.0091  |       |
|    |                        | 38      | methanol             | 0.1828  | [32]  |
|    |                        | 41      | n-butyl acetate      | 0.0126  |       |
| 46 | propylene glycol       | 0.1181  |                      |         |       |
| 47 | tetrahydrofuran        | 0.0007  |                      |         |       |
| 59 | sulfamethoxazole       | 6       | 1-octanol            | 0.187   | [133] |
|    |                        | 13      | 2-propanol           | 1.1293  |       |
|    |                        | 19      | benzene              | 0.0576  | [134] |
|    |                        | 22      | chloroform           | 0.1545  |       |
|    |                        | 38      | methanol             | 11.3991 |       |
| 60 | sulfamethoxypyridazine | 2       | 1,4-dioxane          | 7.7899  |       |
|    |                        | 3       | 1-butanol            | 0.2763  |       |
|    |                        | 6       | 1-octanol            | 0.0667  |       |
|    |                        | 7       | 1-pentanol           | 0.2642  | [135] |
|    |                        | 13      | 2-propanol           | 0.252   |       |
|    |                        | 15      | acetone              | 4.4715  |       |
| 19 | benzene                | 0.0215  |                      |         |       |



|    |                                          |    |                           |          |       |
|----|------------------------------------------|----|---------------------------|----------|-------|
|    |                                          | 22 | chloroform                | 0.3033   |       |
|    |                                          | 29 | ethanol                   | 0.7676   |       |
|    |                                          | 30 | ethyl acetate             | 0.6535   |       |
|    |                                          | 32 | ethylene glycol           | 2.2511   |       |
|    |                                          | 35 | isobutanol                | 0.1627   |       |
|    |                                          | 38 | methanol                  | 2.5795   |       |
|    |                                          | 41 | n-butyl acetate           | 0.2125   |       |
|    |                                          | 46 | propylene glycol          | 1.9664   |       |
|    |                                          | 47 | tetrahydrofuran           | 0.0156   |       |
| 61 | Sulfapyridine                            | 6  | 1-octanol                 | 0.0151   | [133] |
|    |                                          | 13 | 2-propanol                | 0.2229   | [134] |
| 62 | Testosterone                             | 4  | 1-heptanol                | 13.3115  | [136] |
|    |                                          | 5  | 1-hexanol                 | 14.7633  |       |
|    |                                          | 6  | 1-octanol                 | 13.3623  |       |
|    |                                          | 7  | 1-pentanol                | 15.418   |       |
|    |                                          | 42 | n-heptane                 | 0.0446   |       |
|    |                                          | 44 | octane                    | 0.0452   |       |
| 63 | Testosterone propionate                  | 19 | benzene                   | 139.269  | [137] |
|    |                                          | 20 | carbon tetrachloride      | 42.6574  |       |
|    |                                          | 21 | chlorobenzene             | 113.199  |       |
|    |                                          | 23 | cyclohexane               | 4.9716   |       |
|    |                                          | 34 | hexane                    | 2.0088   |       |
|    |                                          | 42 | n-heptane                 | 2.0056   |       |
|    |                                          | 44 | octane                    | 2.4627   |       |
|    |                                          | 47 | tetrahydrofuran           | 119.4384 |       |
| 64 | theophylline                             | 3  | 1-butanol                 | 0.2888   | [138] |
|    |                                          | 8  | 1-propanol                | 0.3656   | [50]  |
|    |                                          | 13 | 2-propanol                | 0.3909   | [138] |
|    |                                          | 15 | acetone                   | 0.3436   | [139] |
|    |                                          | 16 | acetonitrile              | 0.1878   | [140] |
|    |                                          | 22 | chloroform                | 0.2573   | [138] |
|    |                                          | 29 | ethanol                   | 0.5343   | [139] |
|    |                                          | 30 | ethyl acetate             | 0.1519   | [50]  |
|    |                                          | 38 | methanol                  | 0.3542   | [141] |
|    |                                          | 47 | tetrahydrofuran           | 0.5221   | [50]  |
|    |                                          | 49 | water                     | 0.7421   | [142] |
| 65 | triclosan                                | 22 | chloroform                | 169.9449 | [143] |
|    |                                          | 42 | n-heptane                 | 8.5075   |       |
| 66 | trimethoprim                             | 3  | 1-butanol                 | 0.2488   | [144] |
|    |                                          | 7  | 1-pentanol                | 0.2232   |       |
|    |                                          | 9  | 2-butanol                 | 0.2204   |       |
|    |                                          | 13 | 2-propanol                | 0.1558   |       |
|    |                                          | 15 | acetone                   | 0.4451   |       |
|    |                                          | 29 | ethanol                   | 0.4293   |       |
|    |                                          | 38 | methanol                  | 1.5684   |       |
|    |                                          | 47 | tetrahydrofuran           | 0.472    |       |
| 67 | tris(1,2-dioxyphenyl)cyclotriphosphazene | 1  | 1,2-dichloroethane        | 0.2717   | [145] |
|    |                                          | 15 | acetone                   | 0.2555   |       |
|    |                                          | 22 | chloroform                | 0.8251   |       |
|    |                                          | 25 | dichloromethane           | 0.949    |       |
|    |                                          | 29 | ethanol                   | 0.1169   |       |
|    |                                          | 47 | tetrahydrofuran           | 0.7109   |       |
|    |                                          | 48 | toluene                   | 0.4329   |       |
| 68 | valsartan                                | 16 | acetonitrile              | 15.664   | [146] |
|    |                                          | 22 | chloroform                | 1.5534   |       |
|    |                                          | 25 | dichloromethane           | 1.9612   |       |
| 69 | gsk-Q                                    | 10 | 2-butanone                | 2.0621   | ##    |
|    |                                          | 11 | 2-methoxy-2-methylpropane | 0.1486   | ##    |
|    |                                          | 16 | acetonitrile              | 0.1426   | ##    |
|    |                                          | 30 | ethyl acetate             | 0.9756   | ##    |
|    |                                          | 37 | isopropyl acetate         | 0.8028   | ##    |
|    |                                          | 48 | toluene                   | 0.046    | ##    |
| 70 | gsk-A                                    | 1  | 1,2-dichloroethane        | 1.438    | ##    |
|    |                                          | 2  | 1,4-dioxane               | 0.3226   | ##    |
|    |                                          | 3  | 1-butanol                 | 0.0592   | ##    |
|    |                                          | 8  | 1-propanol                | 0.0504   | ##    |
|    |                                          | 9  | 2-butanol                 | 0.0427   | ##    |

|    |       |    |                           |         |    |
|----|-------|----|---------------------------|---------|----|
|    |       | 10 | 2-butanone                | 1.4214  | ## |
|    |       | 11 | 2-methoxy-2-methylpropane | 0.0075  | ## |
|    |       | 12 | 2-methyltetrahydrofuran   | 0.1624  | ## |
|    |       | 13 | 2-propanol                | 0.0539  | ## |
|    |       | 14 | 4-methyl-2-pentanone      | 0.3232  | ## |
|    |       | 15 | acetone                   | 2.4343  | ## |
|    |       | 16 | acetonitrile              | 4.1959  | ## |
|    |       | 18 | anisole                   | 0.3236  | ## |
|    |       | 21 | chlorobenzene             | 0.0638  | ## |
|    |       | 25 | dichloromethane           | 2.6862  | ## |
|    |       | 29 | ethanol                   | 0.1442  | ## |
|    |       | 30 | ethyl acetate             | 0.2776  | ## |
|    |       | 32 | ethylene glycol           | 0.2643  | ## |
|    |       | 37 | isopropyl acetate         | 0.1843  | ## |
|    |       | 38 | methanol                  | 0.5194  | ## |
|    |       | 39 | methyl acetate            | 0.9211  | ## |
|    |       | 40 | methylcyclohexane         | 0.0062  | ## |
|    |       | 41 | n-butyl acetate           | 0.211   | ## |
|    |       | 42 | n-heptane                 | 0.0072  | ## |
|    |       | 43 | n-propyl acetate          | 0.2441  | ## |
|    |       | 47 | tetrahydrofuran           | 0.7466  | ## |
|    |       | 48 | toluene                   | 0.0281  | ## |
|    |       | 49 | water                     | 0.4711  | ## |
| 71 | gsk-H | 1  | 1,2-dichloroethane        | 10.3363 | ## |
|    |       | 21 | chlorobenzene             | 2.4416  | ## |
|    |       | 25 | dichloromethane           | 3.7823  | ## |
|    |       | 40 | methylcyclohexane         | 0.0425  | ## |
|    |       | 42 | n-heptane                 | 0.0411  | ## |
|    |       | 48 | toluene                   | 4.3255  | ## |
| 72 | gsk-S | 3  | 1-butanol                 | 25.5876 | ## |
|    |       | 13 | 2-propanol                | 31.4802 | ## |
|    |       | 18 | anisole                   | 10.0299 | ## |
|    |       | 24 | cyclohexanone             | 24.5607 | ## |
|    |       | 30 | ethyl acetate             | 32.4112 | ## |
|    |       | 37 | isopropyl acetate         | 29.1601 | ## |
|    |       | 40 | methylcyclohexane         | 45.0723 | ## |
|    |       | 49 | water                     | 0.0143  | ## |
| 73 | gsk-Z | 12 | 2-methyltetrahydrofuran   | 8.0148  | ## |
|    |       | 15 | acetone                   | 7.9983  | ## |
|    |       | 16 | acetonitrile              | 2.1316  | ## |
|    |       | 40 | methylcyclohexane         | 0.3326  | ## |
|    |       | 42 | n-heptane                 | 7.4675  | ## |
|    |       | 47 | tetrahydrofuran           | 7.7727  | ## |
|    |       | 48 | toluene                   | 1.4353  | ## |
| 74 | gsk-E | 10 | 2-butanone                | 3.6522  | ## |
|    |       | 11 | 2-methoxy-2-methylpropane | 1.4857  | ## |
|    |       | 16 | acetonitrile              | 1.5377  | ## |
|    |       | 30 | ethyl acetate             | 3.1818  | ## |
|    |       | 37 | isopropyl acetate         | 2.7294  | ## |
|    |       | 48 | toluene                   | 2.9425  | ## |
| 75 | gsk-B | 3  | 1-butanol                 | 26.333  | ## |
|    |       | 9  | 2-butanol                 | 26.8157 | ## |
|    |       | 10 | 2-butanone                | 32.4269 | ## |
|    |       | 11 | 2-methoxy-2-methylpropane | 40.67   | ## |
|    |       | 12 | 2-methyltetrahydrofuran   | 31.0638 | ## |
|    |       | 13 | 2-propanol                | 26.6172 | ## |
|    |       | 14 | 4-methyl-2-pentanone      | 26.8182 | ## |
|    |       | 15 | acetone                   | 45.9522 | ## |
|    |       | 16 | acetonitrile              | 24.6449 | ## |
|    |       | 18 | anisole                   | 21.4686 | ## |
|    |       | 24 | cyclohexanone             | 24.8217 | ## |
|    |       | 29 | ethanol                   | 29.1992 | ## |
|    |       | 30 | ethyl acetate             | 32.9241 | ## |
|    |       | 37 | isopropyl acetate         | 31.4965 | ## |
|    |       | 38 | methanol                  | 32.2754 | ## |
|    |       | 40 | methylcyclohexane         | 34.182  | ## |
|    |       | 42 | n-heptane                 | 42.8235 | ## |

|  |    |                 |         |    |
|--|----|-----------------|---------|----|
|  | 47 | tetrahydrofuran | 33.4494 | ## |
|  | 48 | toluene         | 25.8603 | ## |
|  | 49 | water           | 0.0008  | ## |

\*\* Using all temperature points within the data source, solubility at 25°C was determined using the Van't Hoff equation for solubility.

# Solubility values determined experimentally using a Technobis Crystal16 via turbidity measurements. Heating rate = 0.2°C/min, cooling rate = 0.4°C/min. Cycling four times per sample. Solubility at 25°C was determined using the Van't Hoff equation for solubility.

## Solubility data generated with the automated FreeSlate CM3 platform in a 96 well format using solids in excess, operating in isothermal mode. The HPLC used for determining solute concentration is calibrated prior to sample analysis to identify the specific response factor for the given solute, using the same input material as used in the samples. Only analytical data within the linear calibration range is taken forward.

## SI 5: References

1. Lei, Z.Y., et al., *Solubility of 2-(2,4,6-Trichlorophenoxy)ethyl Bromide in Methanol, Ethanol, Propanol, Isopropanol, Acetonitrile, n-Heptane, and Acetone*. Journal of Chemical and Engineering Data, 2011. **56**(5): p. 2714-2719.
2. Shao, X.Z., L.S. Wang, and M.Y. Li, *Measurement and Correlation of the Solubilities of 2-(6-Oxido-6H-dibenz c,e 1,2 oxaphosphorin-6-yl)methyl butanedioic Acid in Selected Solvents*. Industrial & Engineering Chemistry Research, 2012. **51**(13): p. 5082-5089.
3. Gmehling, J., *Pure compound data from the Dortmund Data Bank (DDB)*. 1983-2014.
4. Kant, S., U.S. Rai, and R.N. Rai, *Thermal and physico-chemical studies on binary organic eutectic systems 4-Aminoacetophenone with benzoin and 4-nitrophenol*. Journal of Thermal Analysis and Calorimetry, 2012. **110**(2): p. 551-557.
5. Shao, X.-Z., et al., *Determination and Correlation of Solubility of Tris(3-hydroxypropyl)phosphine Oxide in Selected Solvents*. Journal of Chemical & Engineering Data, 2013. **58**(3): p. 598-604.
6. Monte, M.J.S., et al., *Vapour pressures, enthalpies and entropies of sublimation of para substituted benzoic acids*. Journal of Thermal Analysis and Calorimetry, 2010. **100**(2): p. 465-474.
7. Wang, S.X., et al., *Heat capacity and thermodynamic properties of benzyl disulfide (C14H14S2)*. Thermochimica Acta, 2007. **463**(1-2): p. 21-25.
8. Liu, C.J., et al., *Facile Method for the Prediction of Anhydrate/Hydrate Transformation Point*. Industrial & Engineering Chemistry Research, 2013. **52**(46): p. 16506-16512.
9. Meltzer, V. and E. Pincu, *Thermodynamic study of binary mixture of citric acid and tartaric acid*. Central European Journal of Chemistry, 2012. **10**(5): p. 1584-1589.
10. Talja, R.A. and Y.H. Roos, *Phase and state transition effects on dielectric, mechanical, and thermal properties of polyols*. Thermochimica Acta, 2001. **380**(2): p. 109-121.
11. Surov, A.O., et al., *Thermodynamic and Structural Aspects of Some Fenamate Molecular Crystals*. Crystal Growth & Design, 2009. **9**(7): p. 3265-3272.
12. Chelouche, S., et al., *Experimental and modeling studies of binary organic eutectic systems to be used as stabilizers for nitrate esters-based energetic materials*. Fluid Phase Equilibria, 2019. **498**: p. 104-115.
13. Zhang, P., et al., *Measurement and Correlation of the Solubility of Florfenicol Form A in Several Pure and Binary Solvents*. Journal of Chemical & Engineering Data, 2018. **63**(6): p. 2046-2055.
14. Lu, M., et al., *Solubility and solution thermodynamics of Raspberry Ketone in pure organic solvents and binary solvent mixtures from T=(293.15 to 333.15) K*. Journal of Molecular Liquids, 2017. **246**: p. 332-341.
15. Nielsen, T.L., et al., *The CAPEC Database*. Journal of Chemical & Engineering Data, 2001. **46**(5): p. 1041-1044.
16. Paus, R., et al., *Dissolution of Crystalline Pharmaceuticals: Experimental Investigation and Thermodynamic Modeling*. Industrial & Engineering Chemistry Research, 2015. **54**(2): p. 731-742.
17. Chebil, L., et al., *Solubility of Flavonoids in Organic Solvents*. Journal of Chemical & Engineering Data, 2007. **52**(5): p. 1552-1556.
18. Moodley, K., J. Rarey, and D. Ramjugernath, *Experimental solubility data for prednisolone and hydrocortisone in various solvents between (293.2 and 328.2) K by employing combined DTA/TGA*. Journal of Molecular Liquids, 2017. **240**: p. 303-312.
19. WEI, D., F. LI, and W. ZHANG, *Determination of Solid-Liquid Equilibria Data of Dihydroxyphenols*. Chemical Industry and Engineering, 2004(3): p. 227-230.
20. Gracin, S. and Å.C. Rasmuson, *Solubility of Phenylacetic Acid, p-Hydroxyphenylacetic Acid, p-Aminophenylacetic Acid, p-Hydroxybenzoic Acid, and Ibuprofen in Pure Solvents*. Journal of Chemical & Engineering Data, 2002. **47**(6): p. 1379-1383.
21. Legendre, B. and Y. Feutelais, *Polymorphic and thermodynamic study of indomethacin*. Journal of Thermal Analysis and Calorimetry, 2004. **76**(1): p. 255-264.

22. Chadha, R., P. Arora, and S. Bhandari, *Polymorphic Forms of Lamivudine: Characterization, Estimation of Transition Temperature, and Stability Studies by Thermodynamic and Spectroscopic Studies*. ISRN Thermodynamics, 2012. **2012**: p. 671027.
23. Nti-Gyabaah, J., et al., *Solubility of lovastatin in a family of six alcohols: Ethanol, 1-propanol, 1-butanol, 1-pentanol, 1-hexanol, and 1-octanol*. International Journal of Pharmaceutics, 2008. **359**(1-2): p. 111-117.
24. Li, J., et al., *Solubility and thermodynamic properties of maltol in different pure solvents*. Journal of Molecular Liquids, 2017. **243**: p. 313-323.
25. Barrio, M., et al., *The Pressure-Temperature Phase Diagram of Metacetamol and Its Comparison to the Phase Diagram of Paracetamol*. Journal of Pharmaceutical Sciences, 2017. **106**(6): p. 1538-1544.
26. Sabbah, R. and L. Perez, *Étude thermodynamique des acides phtalique, isophtalique et téréphtalique*. Canadian Journal of Chemistry, 1999. **77**(9): p. 1508-1513.
27. Perlovich, G.L., et al., *Solubility and Transfer Processes of Some Hydrazones in Biologically Relevant Solvents*. Journal of Chemical & Engineering Data, 2013. **58**(9): p. 2659-2667.
28. Sabbah, R. and S. Ider, *Energetics of inter- and intramolecular bonds in three carboxypyridinic acids (picolinic, nicotinic, and isonicotinic acids)*. Canadian Journal of Chemistry, 1999. **77**(2): p. 249-257.
29. Danilin, V.N., et al., *Phase diagrams of binary systems formed by saturated fatty acids*. Russian Journal of Physical Chemistry, 2001. **75**(1): p. 18-20.
30. Sacchetti, M., *Thermodynamic analysis of DSC data for acetaminophen polymorphs*. Journal of Thermal Analysis and Calorimetry, 2000. **63**(2): p. 345-350.
31. Tian, N.-N., et al., *Solubilities of Phenylphosphinic Acid, Methylphenylphosphinic Acid, Hexachlorocyclotriphosphazene, and Hexaphenoxycyclotriphosphazene in Selected Solvents*. Journal of Chemical & Engineering Data, 2011. **56**(3): p. 661-670.
32. Bustamante, P., A. Martin, and M.A. Gonzalezguisandez, *Partial Solubility Parameters and Solvatochromic Parameters for Predicting the Solubility Of Single And Multiple-Drugs In Individual Solvents*. Journal of Pharmaceutical Sciences, 1993. **82**(6): p. 635-640.
33. Kikic, I., et al., *Antisolvent Precipitation of Vitamin B6: A Thermodynamic Study*. Journal of Chemical and Engineering Data, 2011. **56**(12): p. 4978-4983.
34. Wang, K., et al., *Solubilities of succinimide in different pure solvents and binary methanol plus ethyl acetate solvent mixtures*. Thermochimica Acta, 2012. **538**: p. 79-85.
35. Remil Aguda and Chau-Chyun Chen, *Solubility of Nutraceutical Compounds in Generally Recognized as Safe Solvents at 298 K*. International Journal of Chemical Engineering and Applications, 2016. **7**: p. 289-294.
36. Mota, F.L., et al., *Aqueous solubility of some natural phenolic compounds*. Industrial & Engineering Chemistry Research, 2008. **47**(15): p. 5182-5189.
37. Martínez, F., C.M. Ávila, and A. Gómez, *Thermodynamic study of the solubility of some sulfonamides in cyclohexane*. Journal of the Brazilian Chemical Society, 2003. **14**: p. 803-808.
38. Mantheni, D.R., et al., *Solid state studies of drugs and chemicals by dielectric and calorimetric analysis*. Journal of Thermal Analysis and Calorimetry, 2012. **108**(1): p. 227-233.
39. Wassvik, C.M., et al., *Contribution of solid-state properties to the aqueous solubility of drugs*. European Journal of Pharmaceutical Sciences, 2006. **29**(3-4): p. 294-305.
40. Xu, F., et al., *Low Temperature Heat Capacity and Thermal Analysis of Caffeine, Theophylline and Aminophylline*. Acta Physico-Chimica Sinica, 2010. **26**(8): p. 2096-2102.
41. Tian, N.N., L.S. Wang, and R.Y. Jiang, *Solubilities of Tris(o-phenylenedioxy)cyclotriphosphazene in Selected Solvents*. Journal of Chemical and Engineering Data, 2011. **56**(7): p. 3208-3213.
42. Kleineberg, H., *Experimental and theoretical determination of the solubility of drugs*. Universdität Oldenburg, Bachelor (undergraduate Thesis), 2009: p. 1-97.
43. Lei, Z., et al., *Solubility of 2-(2,4,6-Trichlorophenoxy)ethyl Bromide in Methanol, Ethanol, Propanol, Isopropanol, Acetonitrile, n-Heptane, and Acetone*. Journal of Chemical & Engineering Data, 2011. **56**(5): p. 2714-2719.
44. Shao, X.-Z., L.-S. Wang, and M.-Y. Li, *Measurement and Correlation of the Solubilities of 2-[(6-Oxido-6H-dibenz[c,e][1,2]oxaphosphorin-6-yl)methyl]butanedioic Acid in Selected Solvents*. Industrial & Engineering Chemistry Research, 2012. **51**(13): p. 5082-5089.
45. Zhu, Y., et al., *Solubility Modeling and Mixing Properties for Benzoin in Different Monosolvents and Solvent Mixtures at the Temperature Range from 273.15 to 313.15 K*. Journal of Chemical & Engineering Data, 2018. **63**(2): p. 341-351.
46. Li, Q., et al., *Solubility of Veratric Acid in Eight Monosolvents and Ethanol + 1-Butanol at Various Temperatures*. Journal of Chemical & Engineering Data, 2013. **58**(4): p. 1020-1028.

47. Daniels, C.R., et al., *Mathematical correlation of 4-aminobenzoic acid solubilities in organic solvents with the Abraham solvation parameter model*. *Physics and Chemistry of Liquids*, 2004. **42**(6): p. 633-641.
48. Barra, J., M.A. Pena, and P. Bustamante, *Proposition of group molar constants for sodium to calculate the partial solubility parameters of sodium salts using the van Krevelen group contribution method*. *European Journal of Pharmaceutical Sciences*, 2000. **10**(2): p. 153-161.
49. Lazzell, C.L. and J. Johnston, *Solubility Relations of Isomeric Organic Compounds. VIII. Solubility of the Aminobenzoic Acids in Various Liquids*. *The Journal of Physical Chemistry*, 1928. **32**(9): p. 1331-1341.
50. Lin, H.-M. and R.A. Nash, *An Experimental Method for Determining the Hildebrand Solubility Parameter of Organic Nonelectrolytes*. *Journal of Pharmaceutical Sciences*, 1993. **82**(10): p. 1018-1026.
51. Du, Y., et al., *The liquid-liquid phase separation and crystallization of vanillin in 1-propanol/water solution*. *Fluid Phase Equilibria*, 2016. **409**: p. 84-91.
52. Pucher, G. and W.M. Dehn, *Solubilities in mixtures of two solvents*. *Journal of the American Chemical Society*, 1921. **43**(8): p. 1753-1758.
53. Noubigh, A., M. Abderrabba, and E. Provost, *Temperature and salt addition effects on the solubility behaviour of some phenolic compounds in water*. *The Journal of Chemical Thermodynamics*, 2007. **39**(2): p. 297-303.
54. Perlovich, G.L., T.V. Volkova, and A. Bauer-Brandl, *Towards an understanding of the molecular mechanism of solvation of drug molecules: A thermodynamic approach by crystal lattice energy, sublimation, and solubility exemplified by hydroxybenzoic acids*. *Journal of Pharmaceutical Sciences*, 2006. **95**(7): p. 1448-1458.
55. Martin, A., P.L. Wu, and A. Beerbower, *Expanded Solubility Parameter Approach II: P-Hydroxybenzoic Acid and Methyl P-Hydroxybenzoate in Individual Solvents*. *Journal of Pharmaceutical Sciences*, 1984. **73**(2): p. 188-194.
56. Nordstrom, F.L. and A.C. Rasmuson, *Solubility and melting properties of salicylic acid*. *Journal of Chemical and Engineering Data*, 2006. **51**(5): p. 1668-1671.
57. Apelblat, A. and E. Manzurola, *Solubilities of L-aspartic, DL-aspartic, DL-glutamic, p-hydroxybenzoic, o-anisic, p-anisic, and itaconic acids in water from T=278 K to T=345 K*. *The Journal of Chemical Thermodynamics*, 1997. **29**(12): p. 1527-1533.
58. Baena, Y., et al., *Temperature-dependence of the solubility of some acetanilide derivatives in several organic and aqueous solvents*. *Physics and Chemistry of Liquids*, 2004. **42**(6): p. 603-613.
59. Baena, Y., et al., *Temperature-dependence of the solubility of some acetanilide derivatives in several organic and aqueous solvents*. *Physics and Chemistry of Liquids*, 2004. **42**(6): p. 603-613.
60. Shalmashi, A. and A. Eliassi, *Solubility of L-(+)-Ascorbic Acid in Water, Ethanol, Methanol, Propan-2-ol, Acetone, Acetonitrile, Ethyl Acetate, and Tetrahydrofuran from (293 to 323) K*. *Journal of Chemical & Engineering Data*, 2008. **53**(6): p. 1332-1334.
61. Beerbower, A., P.L. Wu, and A. Martin, *Expanded Solubility Parameter Approach .1. Naphthalene And Benzoic-Acid In Individual Solvents*. *Journal of Pharmaceutical Sciences*, 1984. **73**(2): p. 179-188.
62. Restaino, F.A. and A.N. Martin, *Solubility of Benzoic Acid And Related Compounds in Series of N-Alkanols*. *Journal of Pharmaceutical Sciences*, 1964. **53**(6): p. 636.
63. Febra, S.A., et al., *Extending the SAFT- $\gamma$  Mie approach to model benzoic acid, diphenylamine, and mefenamic acid: solubility prediction and experimental measurement*. *Fluid Phase Equilibria*, 2021: p. 113002.
64. Perlovich, G.L. and A. Bauer-Brandl, *Thermodynamics of solutions I: Benzoic acid and acetylsalicylic acid as models for drug substances and the prediction of solubility*. *Pharmaceutical Research*, 2003. **20**(3): p. 471-478.
65. Wang, Y., et al., *Solubility of Benzyl Disulfide in Five Organic Solvents between (283.45 and 333.15) K*. *Journal of Chemical & Engineering Data*, 2013. **58**(9): p. 2483-2486.
66. Alexander, K.S., et al., *Solubility Profiles and Thermodynamics of Parabens in Aliphatic-Alcohols*. *Journal of Pharmaceutical Sciences*, 1977. **66**(1): p. 42-48.
67. Liu, W., et al., *Solubility of Carbamazepine (Form III) in Different Solvents from (275 to 343) K*. *Journal of Chemical & Engineering Data*, 2008. **53**(9): p. 2204-2206.
68. Greene, L.R., A.C. Blackburn, and J.M. Miller, *Rapid, small-scale determination of organic solvent solubility using a thermogravimetric analyzer*. *Journal of Pharmaceutical and Biomedical Analysis*, 2005. **39**(1-2): p. 344-347.
69. Barra, J., et al., *The expanded Hansen approach to solubility parameters. Paracetamol and citric acid in individual solvents*. *Journal of Pharmacy and Pharmacology*, 1997. **49**(7): p. 644-651.
70. Yang, H. and J.-h. Wang, *Solubilities of 3-Carboxy-3-hydroxypentanedioic Acid in Ethanol, Butan-1-ol, Water, Acetone, and Methylbenzene*. *Journal of Chemical & Engineering Data*, 2011. **56**(4): p. 1449-1451.

71. Seidell, A. and W.F. Linke, *Solubilities of inorganic and metal organic compounds; a compilation of quantitative solubility data from the periodical literature*. 1940-41.
72. Qin, Y., et al., *Solubility of 2-Hydroxypropane-1,2,3-tricarboxylic Acid Monohydrate in Different Binary Solvents from (278.15 to 303.15) K*. Journal of Chemical & Engineering Data, 2014. **59**(2): p. 376-381.
73. Apelblat, A. and E. Manzurola, *Solubility of oxalic, malonic, succinic, adipic, maleic, malic, citric, and tartaric acids in water from 278.15 to 338.15 K*. The Journal of Chemical Thermodynamics, 1987. **19**(3): p. 317-320.
74. Macedo, E.A. and A.M. Peres, *Thermodynamics of Ternary Mixtures Containing Sugars. SLE of d-Fructose in Pure and Mixed Solvents. Comparison between Modified UNIQUAC and Modified UNIFAC*. Industrial & Engineering Chemistry Research, 2001. **40**(21): p. 4633-4640.
75. Vasatko, J. and A. Smelik, *Solubility of anhydrous beta-d-fructose in water*. Chemické Zvesti, 1967. **21**(9-10): p. 736.
76. Zhi, W., et al., *Measurement and correlation of solubility of d-sorbitol in different solvents*. Journal of Molecular Liquids, 2013. **187**: p. 201-205.
77. Lou, Y., et al., *Thermodynamic equilibrium and cosolvency of florfenicol in binary solvent system*. Journal of Molecular Liquids, 2018. **251**: p. 83-91.
78. Wang, S., N. Chen, and Y. Qu, *Solubility of Florfenicol in Different Solvents at Temperatures from (278 to 318) K*. Journal of Chemical & Engineering Data, 2011. **56**(3): p. 638-641.
79. Weiss, J.M. and C.R. Downs, *The physical properties of maleic, fumaric and malic acids*. Journal of the American Chemical Society, 1923. **45**(4): p. 1003-1008.
80. Zhao, Y., et al., *Solubility Determination and Correlation of Glibenclamide in 11 Monosolvents and (Acetone + Acetonitrile) Binary Solvents from 283.15 K to 323.15 K*. Journal of Chemical & Engineering Data, 2019. **64**(1): p. 189-201.
81. Ramakers, L.A.I., et al., *Investigation of Metastable Zones and Induction Times in Glycine Crystallization across Three Different Antisolvents*. Crystal Growth & Design, 2020. **20**(8): p. 4935-4944.
82. Fan, J.-P., et al., *Measurement and correlation of the solubility of genistin in eleven organic solvents from T=(283.2 to 323.2)K*. The Journal of Chemical Thermodynamics, 2015. **89**: p. 142-147.
83. Subrahmanyam, C.V.S. and S. Suresh, *Solubility behaviour of haloperidol in individual solvents determination of partial solubility parameters*. European Journal of Pharmaceutics and Biopharmaceutics, 1999. **47**(3): p. 289-294.
84. Liu, L. and J. Chen, *Solubility of Hesperetin in Various Solvents from (288.2 to 323.2) K*. Journal of Chemical & Engineering Data, 2008. **53**(7): p. 1649-1650.
85. Ferreira, O. and S.P. Pinho, *Solubility of Flavonoids in Pure Solvents*. Industrial & Engineering Chemistry Research, 2012. **51**(18): p. 6586-6590.
86. Bushinsk.Vi, G.N. Freidlin, and Kolomiet.Va, *Correlation between solubility of solids in liquids and free-energy of intermolecular reaction of solvent*. Zhurnal Prikladnoi Khimii, 1974. **47**(5): p. 1054-1058.
87. Smolyan, Z.S., et al., *The solubility of carboxynitrilic and adipic acid in some solvents*. Khim. Prom-st (Moscow), 1972. **48**: p. 508.
88. Wei, D. and W. Cao, *Solubility of Adipic Acid in Acetone, Chloroform, and Toluene*. Journal of Chemical & Engineering Data, 2009. **54**(1): p. 152-153.
89. Zhang, H., et al., *An odd-even effect on solubility of dicarboxylic acids in organic solvents*. Journal of Chemical Thermodynamics, 2014: p. 91-97.
90. Machado, P.G., et al., *Phase Equilibrium Involving Xylose, Water, and Ethylene Glycol or 1,2-Propylene Glycol at Different Temperatures*. Journal of Chemical & Engineering Data, 2019. **64**(5): p. 2163-2169.
91. Hagen, T.A. and G.L. Flynn, *Solubility of hydrocortisone in organic and aqueous-media - evidence for regular solution behavior in apolar solvents*. Journal of Pharmaceutical Sciences, 1983. **72**(4): p. 409-414.
92. Li, X.N., et al., *Solubility of hydroquinone in different solvents from 276.65 K to 345.10 K*. Journal of Chemical and Engineering Data, 2006. **51**(1): p. 127-129.
93. Bustamante, P., M.A. Pena, and J. Barra, *The modified extended Hansen method to determine partial solubility parameters of drugs containing a single hydrogen bonding group and their sodium derivatives: benzoic acid/Na and ibuprofen/Na*. International Journal of Pharmaceutics, 2000. **194**(1): p. 117-124.
94. Stovall, D.M., et al., *Solubility of crystalline nonelectrolyte solutes in organic solvents: Mathematical correlation of ibuprofen solubilities with the Abraham solvation parameter model*. Physics and Chemistry of Liquids, 2005. **43**(3): p. 261-268.
95. Perciballi, F., *Formation of optimised particles for formulation and processing*, in *Strathclyde Institute of Pharmacy and Biomedical Sciences*. 2018, University of Strathclyde.
96. Ruidiaz, M.A., et al., *Solubility and preferential solvation of indomethacin in 1,4-dioxane+water solvent mixtures*. Fluid Phase Equilibria, 2010. **299**(2): p. 259-265.

97. Nandi, I., M. Bari, and H. Joshi, *Study of isopropyl myristate microemulsion systems containing cyclodextrins to improve the solubility of 2 model hydrophobic drugs*. AAPS PharmSciTech, 2003. **4**(1): p. 71-79.
98. Shakeel, F., et al., *Solubility prediction of indomethacin in PEG 400+water mixtures at various temperatures*. Journal of Molecular Liquids, 2013. **188**: p. 28-32.
99. Lim, J., et al., *Solubility of triclosan and iodopropynyl butylcarbamate in pure alkanols at several temperatures*. Fluid Phase Equilibria, 2012. **332**: p. 144-150.
100. Heryanto, R., M. Hasan, and E.C. Abdullah, *Solubility of Isoniazid in Various Organic Solvents from (301 to 313) K*. Journal of Chemical & Engineering Data, 2008. **53**(8): p. 1962-1964.
101. Perlovich, G.L., et al., *Thermodynamics of solutions IV: Solvation of ketoprofen in comparison with other NSAIDs*. Journal of Pharmaceutical Sciences, 2003. **92**(12): p. 2502-2511.
102. Daniels, C.R., et al., *Thermochemical behavior of dissolved carboxylic acid solutes: Part 2 - Mathematical correlation of ketoprofen solubilities with the Abraham general solvation model*. Physics and Chemistry of Liquids, 2004. **42**(3): p. 305-312.
103. Jozwiakowski, M.J., et al., *Solubility Behavior of Lamivudine Crystal Forms in Recrystallization Solvents*. Journal of Pharmaceutical Sciences, 1996. **85**(2): p. 193-199.
104. Ojo, E., et al., *Developing process understanding for continuous manufacturing of Lamivudine (Epivir®) Stable Form I*, in BACG Conference. 2019: London.
105. Nti-Gyabaah, J. and Y.C. Chiew, *Solubility of lovastatin in ethyl acetate, propyl acetate, isopropyl acetate, butyl acetate, sec-butyl acetate, isobutyl acetate, tert-butyl acetate, and 2-butanone, between (285 and 313) K*. Journal of Chemical and Engineering Data, 2008. **53**(9): p. 2060-2065.
106. Sun, H., J.B. Gong, and J.K. Wang, *Solubility of lovastatin in acetone, methanol, ethanol, ethyl acetate, and butyl acetate between 283 K and 323 K*. Journal of Chemical and Engineering Data, 2005. **50**(4): p. 1389-1391.
107. Abdul Mudalip, S.K., et al., *Solubility and Dissolution Thermodynamic Data of Mefenamic Acid Crystals in Different Classes of Organic Solvents*. Journal of Chemical & Engineering Data, 2013. **58**(12): p. 3447-3452.
108. Erriguible, A., et al., *Effect of pressure and non-isothermal injection on re-crystallization by CO<sub>2</sub> antisolvent: Solubility measurements, simulation of mixing and experiments*. The Journal of Supercritical Fluids, 2013. **76**: p. 115-125.
109. Alsenz, J., E. Meister, and E. Haenel, *Development of a partially automated solubility screening (PASS) assay for early drug development*. Journal of Pharmaceutical Sciences, 2007. **96**(7): p. 1748-1762.
110. Schmidt, A., et al., *Determination of Abraham model solute descriptors for isophthalic acid from experimental solubility data in organic solvents at 298 K*. Physics and Chemistry of Liquids, 2016. **54**(6): p. 747-757.
111. Long, B. and Z. Yang, *Measurements of the solubilities of m-phthalic acid in acetone, ethanol and acetic ether*. Fluid Phase Equilibria, 2008. **266**(1): p. 38-41.
112. Bustamante, P., A. Pena, and J. Barra, *Partial-solubility parameters of naproxen and sodium diclofenac*. Journal of Pharmacy and Pharmacology, 1998. **50**(9): p. 975-982.
113. Daniels, C.R., et al., *Mathematical correlation of naproxen solubilities in organic solvents with the Abraham solvation parameter model*. Physics and Chemistry of Liquids, 2004. **42**(5): p. 481-491.
114. Buchholz, H.K., et al., *Thermochemistry of Racemic and Enantiopure Organic Crystals for Predicting Enantiomer Separation*. Crystal Growth & Design, 2017. **17**(9): p. 4676-4686.
115. Carr, A.G., R. Mammucari, and N.R. Foster, *Solubility, Solubility Modeling, and Precipitation of Naproxen from Subcritical Water Solutions*. Industrial & Engineering Chemistry Research, 2010. **49**(19): p. 9385-9393.
116. Gonçalves, E.M. and M.E. Minas da Piedade, *Solubility of nicotinic acid in water, ethanol, acetone, diethyl ether, acetonitrile, and dimethyl sulfoxide*. The Journal of Chemical Thermodynamics, 2012. **47**: p. 362-371.
117. Wang, L.-C. and F.-A. Wang, *Solubility of Niacin in 3-Picoline + Water from (287.65 to 359.15) K*. Journal of Chemical & Engineering Data, 2004. **49**(1): p. 155-156.
118. Jouyban, A., *Handbook of Solubility Data for Pharmaceuticals*. 2009.
119. Yang, W., et al., *Solubility of succinic anhydride in different pure solvents and binary solvent mixtures with the temperature range from 278.15 to 333.15K*. Journal of Molecular Liquids, 2013. **180**: p. 7-11.
120. Granberg, R.A. and A.C. Rasmuson, *Solubility of paracetamol in pure solvents*. Journal of Chemical and Engineering Data, 1999. **44**(6): p. 1391-1395.
121. Brown, C.J., et al., *Enabling precision manufacturing of active pharmaceutical ingredients: workflow for seeded cooling continuous crystallisations*. Molecular Systems Design & Engineering, 2018. **3**(3): p. 518-549.
122. Bustamante, C. and P. Bustamante, *Nonlinear Enthalpy–Entropy Compensation for the Solubility of Phenacetin in Dioxane–Water Solvent Mixtures*. Journal of Pharmaceutical Sciences, 1996. **85**(10): p. 1109-1111.

123. Chang, Q.-L., et al., *Solubility of Phenacetinum in Methanol, Ethanol, 1-Propanol, 1-Butanol, 1-Pentanol, Tetrahydrofuran, Ethyl Acetate, and Benzene between 282.65 K and 333.70 K*. Journal of Chemical & Engineering Data, 2007. **52**(5): p. 1894-1896.
124. Bustamante, P., M.A. Peña, and J. Barra, *Partial solubility parameters of piroxicam and niflumic acid*. International Journal of Pharmaceutics, 1998. **174**(1): p. 141-150.
125. Zi, J., B. Peng, and W. Yan, *Solubilities of rutin in eight solvents at T=283.15, 298.15, 313.15, 323.15, and 333.15K*. Fluid Phase Equilibria, 2007. **261**(1): p. 111-114.
126. De Fina, K.M., et al., *Solubility of 8-hydroxybenzoic acid in select organic solvents at 298.15 K*. Journal of Chemical and Engineering Data, 1999. **44**(6): p. 1262-1264.
127. Yalkowsky, S.H., S.C. Valvani, and T.J. Roseman, *Solubility And Partitioning and Octanol Solubility And Octanol-Water Partition-Coefficients*. Journal of Pharmaceutical Sciences, 1983. **72**(8): p. 866-870.
128. Shalmashi, A. and A. Eliassi, *Solubility of salicylic acid in water, ethanol, carbon tetrachloride, ethyl acetate, and xylene*. Journal of Chemical and Engineering Data, 2008. **53**(1): p. 199-200.
129. Dearden, J.C. and J.G. O'Sullivan, *Solubility of pharmaceuticals in cyclohexane*. Journal of Pharmacy and Pharmacology, 1988. **40**: p. 77.
130. Matsuda, H., et al., *Solubilities of Salicylic Acid in Pure Solvents and Binary Mixtures Containing Cosolvent*. Journal of Chemical and Engineering Data, 2009. **54**(2): p. 480-484.
131. Alwi, H., et al., *Extraction of Antipyretic Properties from Planted AquilariaSubintegra Spp. Dried Leaves*. International Journal of Chemical Engineering and Applications, 2016. **7**(5): p. 319-322.
132. Mauger, J.W., A.N. Paruta, and R.J. Gerraughty, *Solubilities of sulfadiazine, sulfisomidine, and sulfadimethoxine in several normal alcohols*. Journal of Pharmaceutical Sciences, 1972. **61**(1): p. 94.
133. Martinez, F. and A. Gomez, *Thermodynamic study of the solubility of some sulfonamides in octanol, water, and the mutually saturated solvents*. Journal of Solution Chemistry, 2001. **30**(10): p. 909-923.
134. Regosz, A., et al., *Prediction of Solubility Of Sulfonamides in Water And Organic-Solvents Based on The Extended Regular Solution Theory*. International Journal of Pharmaceutics, 1992. **88**(1-3): p. 437-442.
135. Bustamante, P., et al., *Predicting the Solubility Of Sulfamethoxyypyridazine In Individual Solvents .1. Calculating Partial Solubility Parameters*. Journal of Pharmaceutical Sciences, 1989. **78**(7): p. 567-573.
136. Gharavi, M., K.C. James, and L.M. Sanders, *Solubilities of Mestanolone, Methandienone, Methyltestosterone, Nandrolone And Testosterone In Homologous Series of Alkanes And Alkanols*. International Journal of Pharmaceutics, 1983. **14**(2-3): p. 333-341.
137. James, K.C., C.T. Ng, and P.R. Noyce, *Solubilities of testosterone propionate and related esters in organic-solvents*. Journal of Pharmaceutical Sciences, 1976. **65**(5): p. 656-659.
138. Adjei, A., *Solubility of Xanthine Derivatives in Polar and Nonpolar Solvents*. 1980, University of Texas. p. 209.
139. Subra, P., et al., *Precipitation and phase behavior of theophylline in solvent–supercritical CO2 mixtures*. The Journal of Supercritical Fluids, 2005. **35**(2): p. 95-105.
140. Khossravi, D. and K.A. Connors, *Solvent Effects on Chemical Processes, I: Solubility of Aromatic and Heterocyclic Compounds in Binary Aqueous—Organic Solvents*. Journal of Pharmaceutical Sciences, 1992. **81**(4): p. 371-379.
141. Liu, C., et al., *Solid–Liquid Equilibrium of Theophylline in Solvent Mixtures*. Journal of Chemical & Engineering Data, 2014. **59**(2): p. 263-268.
142. Pobudkowska, A., U. Domańska, and J.A. Kryska, *The physicochemical properties and solubility of pharmaceuticals – Methyl xanthines*. The Journal of Chemical Thermodynamics, 2014. **79**: p. 41-48.
143. Aragon, D.M., et al., *Solubility of the Antimicrobial Agent Triclosan in Organic Solvents of Different Hydrogen Bonding Capabilities at Several Temperatures*. Journal of Chemical and Engineering Data, 2008. **53**(11): p. 2576-2580.
144. Li, Q.S., Z. Li, and S. Wang, *Solubility of trimethoprim (TMP) in different organic solvents from (278 to 333) K*. Journal of Chemical and Engineering Data, 2008. **53**(1): p. 286-287.
145. Tian, N.-N., L.-S. Wang, and R.-Y. Jiang, *Solubilities of Tris(o-phenylenedioxy)cyclotriphosphazene in Selected Solvents*. Journal of Chemical & Engineering Data, 2011. **56**(7): p. 3208-3213.
146. Liu, Y., et al., *Solubility of Valsartan in Different Organic Solvents and Ethanol + Water Binary Mixtures from (278.15 to 313.15) K*. Journal of Chemical & Engineering Data, 2009. **54**(3): p. 986-988.
